# Survival in Nuclear Waste, Extreme Resistance, and Potential Applications Gleaned from the Genome Sequence of *Kineococcus radiotolerans* SRS30216

Christopher E. Bagwell<sup>1</sup>, Swapna Bhat<sup>3</sup>, Gary M. Hawkins<sup>3</sup>, Bryan W. Smith<sup>1</sup>, Tapan Biswas<sup>2</sup>, Timothy R. Hoover<sup>3</sup>, Elizabeth Saunders<sup>4</sup>, Cliff S. Han<sup>4</sup>, Oleg V. Tsodikov<sup>2</sup>, Lawrence J. Shimkets<sup>3\*</sup>

**1** Savannah River National Laboratory, Environmental Sciences and Biotechnology, Aiken, South Carolina, United States of America, **2** Department of Medicinal Chemistry, College of Pharmacy, University of Michigan, Ann Arbor, Michigan, United States of America, **3** Department of Microbiology, University of Georgia, Athens, Georgia, United States of America, **4** DOE Joint Genome Institute, Bioscience Division, Los Alamos National Laboratory, Los Alamos, New Mexico, United States of America

## Abstract

*Kineococcus radiotolerans* SRS30216 was isolated from a high-level radioactive environment at the Savannah River Site (SRS) and exhibits  $\gamma$ -radiation resistance approaching that of *Deinococcus radiodurans*. The genome was sequenced by the U.S. Department of Energy's Joint Genome Institute which suggested the existence of three replicons, a 4.76 Mb linear chromosome, a 0.18 Mb linear plasmid, and a 12.92 Kb circular plasmid. Southern hybridization confirmed that the chromosome is linear. The *K. radiotolerans* genome sequence was examined to learn about the physiology of the organism with regard to ionizing radiation resistance, the potential for bioremediation of nuclear waste, and the dimorphic life cycle. *K. radiotolerans* may have a unique genetic toolbox for radiation protection as it lacks many of the genes known to confer radiation resistance in *D. radiodurans*. Additionally, genes involved in the detoxification of reactive oxygen species and the excision repair pathway are overrepresented. *K. radiotolerans* appears to lack degradation pathways for pervasive soil and groundwater pollutants. However, it can respire on two organic acids found in SRS high-level nuclear waste, formate and oxalate, which promote the survival of cells during prolonged periods of starvation. The dimorphic life cycle involves the production of motile zoospores. The flagellar biosynthesis genes are located on a motility island, though its regulation could not be fully discerned. These results highlight the remarkable ability of *K. radiotolerans* to withstand environmental extremes and suggest that *in situ* bioremediation of organic complexants from high level radioactive waste may be feasible.

**Citation:** Bagwell CE, Bhat S, Hawkins GM, Smith BW, Biswas T, et al. (2008) Survival in Nuclear Waste, Extreme Resistance, and Potential Applications Gleaned from the Genome Sequence of *Kineococcus radiotolerans* SRS30216. PLoS ONE 3(12): e3878. doi:10.1371/journal.pone.0003878

**Editor:** Niyaz Ahmed, Centre for DNA Fingerprinting and Diagnostics, India

**Received:** October 6, 2008; **Accepted:** November 4, 2008; **Published:** December 5, 2008

This is an open-access article distributed under the terms of the Creative Commons Public Domain declaration which stipulates that, once placed in the public domain, this work may be freely reproduced, distributed, transmitted, modified, built upon, or otherwise used by anyone for any lawful purpose.

**Funding:** CEB would like to acknowledge support from the U.S. Department of Energy, Office of Environmental Management as administered through the Laboratory Directed Research and Development Program, and the U.S. Department of Energy, Office of Science, Office of Biological and Environmental Research, Environmental Remediation Sciences Program (Contract #KP1302000). LJS would like to acknowledge support from the Office of the Vice President for Research, University of Georgia. The funders had no role in study design, data collection and analysis, decision to publish, or preparation of the manuscript.

**Competing Interests:** The authors have declared that no competing interests exist.

\* E-mail: shimkets@uga.edu

## Introduction

High-level radioactive waste (HLW) is an anthropogenic disturbance to which few organisms are resistant. During the Cold War, Pu<sup>239</sup> production for national defense began by irradiating uranium or other target elements in a nuclear reactor. At Hanford, WA and the Savannah River Site (SRS), SC, irradiated fuel and targets were reprocessed to reclaim approximately 99% of the U<sup>235</sup> and Pu<sup>239</sup> isotopes. All remaining radionuclides, fission products, fuel components, and nonradioactive chemicals used during reclamation make up the HLW, which currently resides at over 100 different sites across the contiguous U.S. and exceeds 1 billion curies. The majority of this lasting Cold War legacy is located at Hanford (roughly 65 million gallons) and SRS (roughly 35 million gallons).

The SRS waste contains Fe, Al, Si, Ca, F, K, alkali cations, organic solvents, radionuclides, and other fission products. Organic constituents include complexants used during separations, radiolysis products from degradation of complexants and solvents, and waste tank decontamination reagents. One of the preferred

decontamination reagents is oxalic acid, which can create problems for storage and final disposal due to its solubility properties as a sodium salt. Additional reagents in use at SRS and Hanford include glycolic acid, citric acid, and formic acid. Removal of organic constituents directly in HLW tanks could greatly improve processing efficiency of HLW.

In 2001, the Committee on Long-Term Research Needs for Radioactive High-Level Waste at Department of Energy Sites recommended the investigation of radioactive waste to identify promising new radiation resistant microorganisms that might be used to degrade some of the organic constituents in the HLW. Radiation dosage is measured in gray (Gy); 1 Gy causes the first signs of radiation sickness in humans. Half of all people exposed to 4.5 Gy die, and doses of 8 Gy or more are invariably fatal to humans. Bacteria are the most extreme examples of radiation resistant organisms. The paradigm is *Deinococcus radiodurans*, which was isolated from canned meat that received 4,000 Gy of ionizing-radiation [1], but many other radiation resistant bacteria have also been identified.

*Kineococcus radiotolerans* SRS30216 was isolated from HLW within a shielded cell work area at the SRS [2]. *K. radiotolerans* is an orange-pigmented, aerobic bacterium belonging to the Actinobacteria phylum that is capable of withstanding relatively high concentrations of metals and alkali cations, as well as exposure to extreme doses of ionizing radiation. *K. radiotolerans* exhibits radiation resistance approaching that of *D. radiodurans* [2]. *D. radiodurans* and *K. radiotolerans* belong to different phyla and it remains unknown whether both organisms attain radiation resistance through a common set of gene products. Because *K. radiotolerans* survived a HLW environment, it is expected to possess potent cellular defense and repair mechanisms for radiation exposure, osmotic stress and chemical toxicity. The occurrence of all these features in a naturally occurring bacterium may have direct applications for the bioremediation of nuclear waste.

In this work the genome sequence of *K. radiotolerans* SRS30216 was examined in three different contexts. First, the presence of genes known to confer radiation resistance in *D. radiodurans* was examined in the *K. radiotolerans* genome. Second, the capacity for bioremediation was assessed by comparative genomics as well as growth and respiration studies. Finally, the dimorphic life cycle of the organism, in particular the production of motile zoospores, was examined by identifying genes involved in flagellar motility and chemotaxis.

## Results and Discussion

### Phylogeny

*K. radiotolerans* belongs to the suborder Frankineae in the order Actinomycetales and the phylum Actinobacteria. Complete genome sequences are available for only two other members of the Frankineae suborder, *Frankia alni* and *Acidothermus cellulosilyticus*. *F. alni* is distinguished by its ability to fix nitrogen in symbiosis with alder (*Alnus* spp.) and myrtle (*Myrica* spp.), two pioneer plants in temperate regions. The *K. radiotolerans* genome shows no potential for nitrogen fixation. *A. cellulosilyticus* is a thermotolerant organism isolated from the hot spring in Yellowstone National Park that degrades cellulose. While the *K. radiotolerans* genome may encode proteins with the potential for degrading complex carbohydrates like cellulose (Krad4622, 3823), cellobiose (Krad0408, 2526, 2530, 2531, 2539, 3436, 3480, 3961), glycogen, and starch (Krad1294, 1298), growth on these substrates has not been demonstrated experimentally.

More distant relatives in the same phylum include *Streptomyces* and *Mycobacterium*, whose physiology has been extensively examined, and which serve as reference points for comparative genomics.

### Genome size and organization

The *K. radiotolerans* SRS30216 genome was sequenced by the US DOE Joint Genome Institute with the discovery of three replicons. The bulk of the DNA is contained on a 4,761,183 bp linear chromosome (CP000750). In addition there is a 182,572 bp linear plasmid (pKRAD01; CP000751) and a 12,917 bp circular plasmid (pKRAD02; CP000752). The three contigs were derived from at least 20 reads and average 74.2 mol % G+C. The genome is predicted to contain 4,715 genes.

Linear chromosomes are rare among prokaryotes. Aside from one atypical *Agrobacterium* isolate, the two principle examples are *Streptomyces* species [3] and *Borrelia burgdorferi* [4]. In both *Streptomyces* and *Borrelia* bidirectional replication occurs from a single origin of replication (*oriC*) located near the middle of the replicon. A plot of the GC skew = (C−G)/(C+G) along the chromosome sometimes inverts at the replication origin [5]. The shift in GC skew is

thought to be due to accumulated mutational biases during leading vs lagging strand synthesis. There is no obvious GC skew at the center of the chromosome (Figure 1, compare green vs magenta peaks in inner circle). There is however a remarkable GC skew at the telomers but it seems unlikely that replication proceeds from the telomers toward the center based on the *Borrelia* and *Streptomyces* systems. A second method used to locate *oriC* is the presence of the *dnaA* gene and DnaA binding sites. *dnaA* (Krad0001) is near the center of the chromosome, as with *Streptomyces* and *Borrelia*. Putative, imperfect blocks of DnaA binding sites, observed using DoriC [6], are widely scattered in the center of the chromosome with the closest being about 94 Kb from the *dnaA* gene.

The topology of the chromosome was investigated by Southern hybridization using an end-specific probe homologous with Krad2223. Three restriction enzymes were predicted to generate single fragments with this probe. If the chromosome is linear then products with sizes predicted from the DNA sequence should be visible after hybridization. If the chromosome is circular then the hybridization products with the probe should be the sum of the sizes of the predicted restriction fragments from each end plus any missing sequence. Restriction fragments homologous with the Krad2223 probe were similar in size to those predicted by the DNA sequence (Fig. 2). These hybridization results confirm the linear topology predicted by the inability of JGI to close the DNA sequence.

The ends of linear DNA replicons have special features that preserve their integrity. *B. burgdorferi* linear replicons contain covalently closed hairpin ends [4]. ResT, telomere resolvase, hydrolyzes a phosphodiester bond on each DNA strand then joins the opposite strands to form a covalently closed telomere. The process is reversed during chromosome replication and ResT is essential for *B. burgdorferi* growth. A ResT homolog is not encoded by the *K. radiotolerans* genome. *Streptomyces coelicolor* replicon ends are composed of single-stranded sequences that can anneal to form a noncovalent circular molecule [3]. *Streptomyces* telomeres bind a family of conserved terminal binding proteins that have no orthologs in the *K. radiotolerans* genome. Thus, unique mechanisms must protect the *K. radiotolerans* telomers.

### Ionizing radiation resistance

Gamma radiation is one of the most energetic forms of electromagnetic radiation. Gamma rays penetrate tissues and cells, causing direct damage to DNA (namely double strand breaks), proteins, and membranes. Gamma radiation also induces indirect cellular damage through the ionization of water with formation of free radical species, primarily •OH. Oxygen free radicals are extremely reactive, compounding cellular and DNA damage. DNA damage blocks transcription and replication, and if not correctly repaired, could introduce detrimental mutations or cause cell death. Relatively few DNA double strand breaks (DSB) are lethal for most bacteria. *Escherichia coli* cells succumb to around 10 DSB and *Shewanella oneidensis* cells die after 1 DSB (based on calculations of 0.0114 DSBs/Gy/Genome; Daly et al., 2004).

Radioreistance has been partially characterized for *K. radiotolerans* (Figure 3). Acutely irradiated, exponentially grown cultures have a broad shoulder of death, which contrasts with the exponential death of *E. coli*. This shoulder is due in part to efficient repair systems and in part to the multicellular nature of the organism. In rich medium *K. radiotolerans* grows in cubical packets that form by alternating cell division planes (Phillips et al. 2002). Thus, the colony forming unit method used to estimate survivorship likely overestimates culture viability. Nevertheless, these results may portray a more ecologically relevant context as cell clustering is common for certain species or developmental

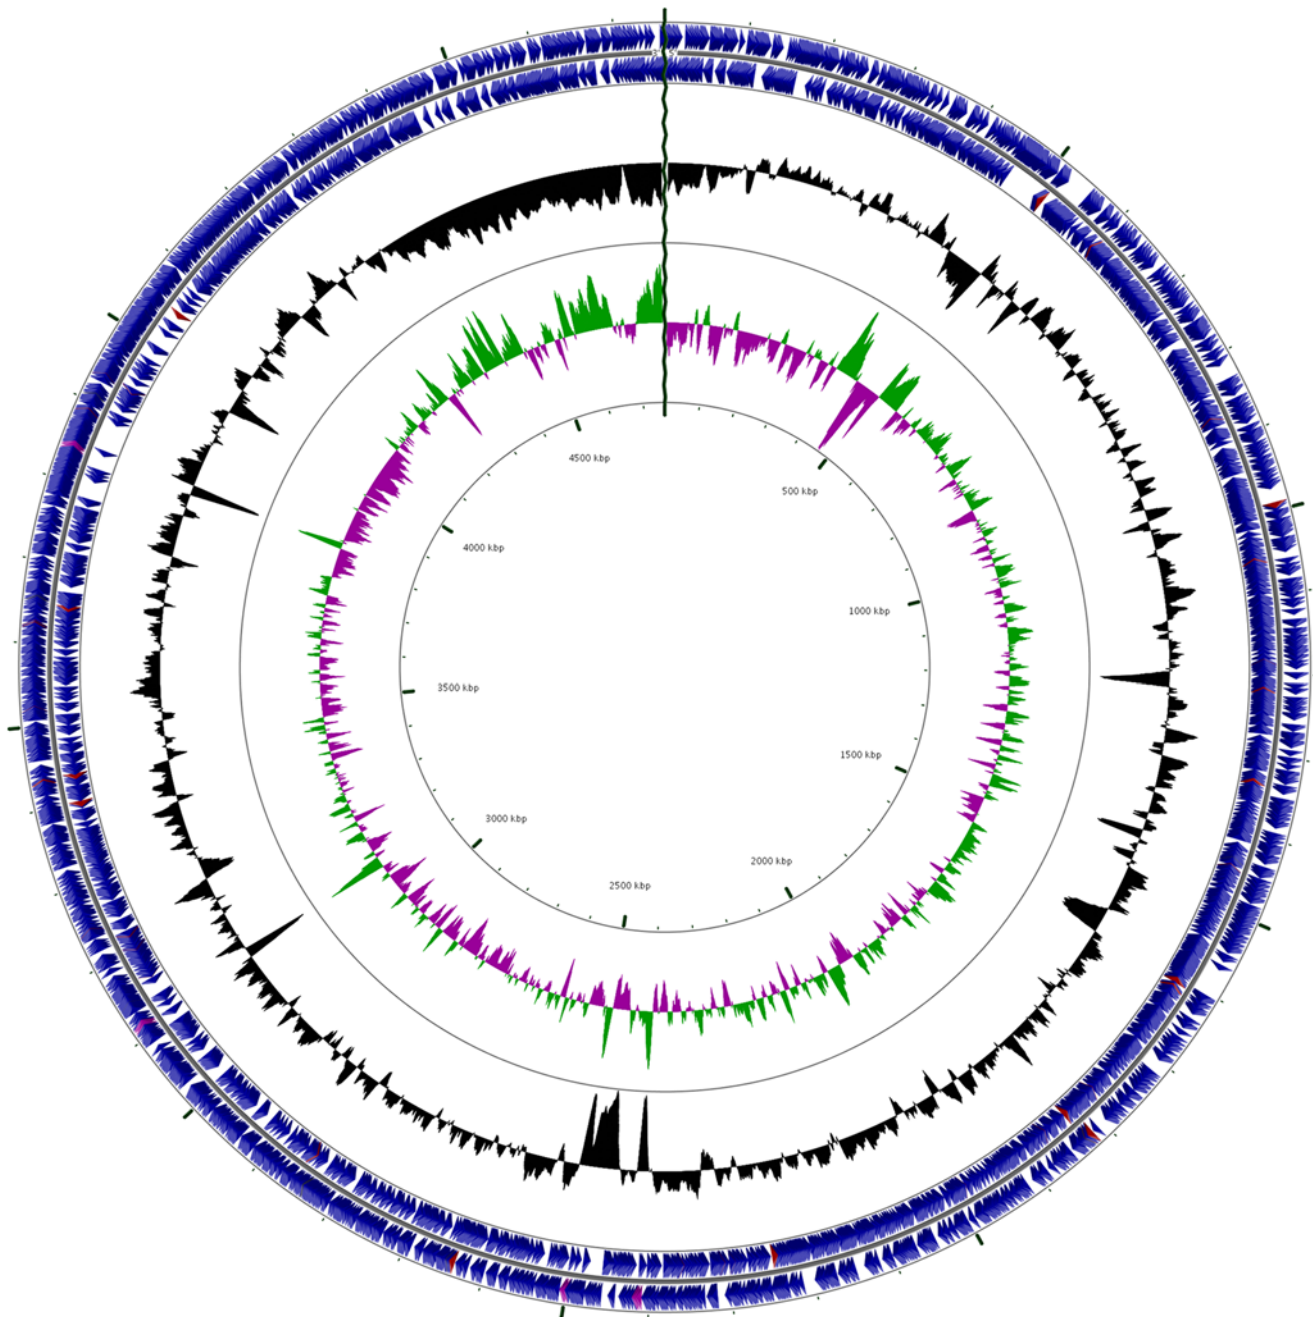

**Figure 1. Gene distribution of the 4.76 Mb *Kineococcus radiotolerans* SRS30216 linear chromosome depicted in circular form.** The break is indicated by a wavy line at 12 o'clock. From the outer to the inner concentric circle: circles 1 and 2, predicted protein coding sequences (CDS) indicated by blue arrows on the forward (outer wheel) and reverse (inner wheel) strands. Red indicates tRNA genes and purple indicates rRNA genes; circle 3, GC content showing deviation from average (74.2%); circle 4, GC skew (+ is green and – is purple); circle 5, genomic position in kb beginning with Krad2223 and proceeding clockwise. The chromosome map was generated using CGview [56].  
doi:10.1371/journal.pone.0003878.g001

stages of Actinobacteria (eg., *Frankia*, *Geodermatophilus*, *Actinoplanes*, *Micrococcus*) or other extremophiles (*Kocuria*, *Deinococcus*, *Chroococcidiopsis*). Remarkably though, *Kineococcus* can withstand the damaging effects of 20 kGy of  $\gamma$ -radiation (theoretically generating more than 200 DSB/genome; Daly et al., 2004) and cell division resumes within 4 days (Figure 4).

Several other Actinobacteria species exhibit extraordinary radiation resistance including *Rubrobacter radiotolerans*, *Rubrobacter xylanophilus*, and *Kocuria rosea* [7]. While more ionizing radiation

resistant bacterial species are found in the Actinobacteria than any other phylum, radiation resistance is not a widespread trait in this phylum and may have multiple evolutionary origins. The mechanisms that render this trait remain poorly understood. Radiation resistant bacteria suffer severe damage from  $\gamma$ -radiation [8], which implies that molecular repair processes function with high efficiency.

Analysis of genes common to four ionizing radiation resistant bacteria with fully sequenced genomes indicated that DNA repair

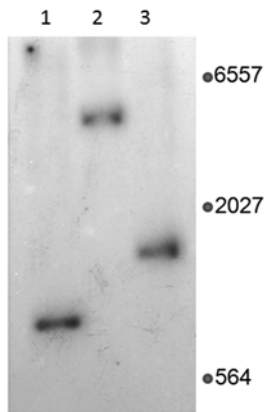

**Figure 2. Southern hybridization reveals a linear chromosome.** PCR was used to generate probes for the first end in the presumptive linear chromosome homologous with a portion of the first gene Krad2223. The genome was digested with one of three restriction enzymes predicted from the DNA sequence to generate a hybridization product with each probe. Lane 1, NcoI; Lane 2, BamHI; Lane 3, BglII. Sizes of molecular markers in base pairs are given in the right hand column. The predicted sizes of the homologous restriction fragments from the DNA sequence are NcoI, 865 bp, BamHI, 3692 bp, and BglII, 1619 bp with the Krad2223 probe. The predicted sizes of the restriction fragments from the other end of the chromosome are NcoI, 775 bp, BamHI, 1363 bp, and BglII, 4018 bp. The observed sizes were calculated using bacteriophage lambda DNA standards digested with HindIII. In all cases the observed sizes were approximately equal to the sizes predicted from a linear chromosome rather than the sum of the sizes from both ends suggesting a linear topology.  
doi:10.1371/journal.pone.0003878.g002

must have played a major role in evolutionary adaptation to ionizing radiation [9]. *D. radiodurans* has served as the paradigm for radiation resistant organisms and both genetic and biochemical approaches are converging to reveal a complex network of repair and protection processes [7,10]. Many *D. radiodurans* genes required for ionizing radiation resistance have been identified. In table 1 they are ordered according to the  $\gamma$ -radiation sensitivity of a *D. radiodurans* strain lacking that gene based on published kill curves. While the roles of only a few of these genes are known with certainty, *K. radiotolerans* apparently employs a different genetic toolbox from that of *D. radiodurans*. Absent from *K. radiotolerans* are

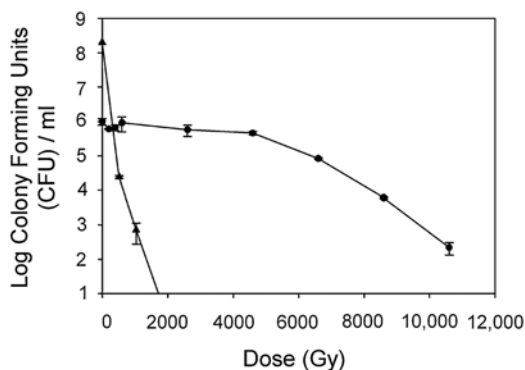

**Figure 3. Resistance of *K. radiotolerans* to acute  $\gamma$ -radiation exposure.** *E. coli* was used as a reference strain. Prior to irradiation, both strains were grown to exponential phase in TGY and LB, respectively. Colony forming units determinations were conducted in triplicate.  
doi:10.1371/journal.pone.0003878.g003

homologs of the *D. radiodurans* *pprA*, *ddrA*, *ddrB*, *ddrC*, *ddrD* genes [11].

Mutations in *recA* render *D. radiodurans* as sensitive to ionizing radiation as *E. coli* illustrating the importance of recombinational repair in repairing DSB (table 1). *D. radiodurans* cells exposed to 10 kGy  $\gamma$ -radiation accumulate about 100 DSB per genome that are repaired over the course of several hours. *D. radiodurans* DSB are repaired by homologous recombination in the extended synthesis-dependent strand annealing (ESDSA) process [12]. ESDSA repair is carried out by RecA and PolA, enzymes found in the *K. radiotolerans* genome (table 2). Based on their genomic analysis, *recA* and *polA* exhibit signs of coevolution in ionizing radiation-resistant bacteria [9].

Genes involved in carotenoid biogenesis have been shown to confer a modest level of radiation resistance [13–15] by scavenging electrons from reactive oxygen species (table 1). *K. radiotolerans* produces carotenoids [2] and the carotenoid biosynthetic pathway is similar to that found in other organisms. In addition to the two genes listed in table 1 encoding phytoene synthetase and phytoene desaturase, *K. radiotolerans* produces polyprenyl synthase (Krad3227), lycopene cyclase (*crtY*, Krad0091), and neurosporene dehydrogenase (*crtD*, Krad3225). A hydroxylase gene (*crtZ*) was not discovered suggesting that the *K. radiotolerans* carotenoids are not hydroxylated.

Higher eukaryotes repair DSB using nonhomologous end joining (NHEJ) [16,17] Riha et al. 2006). NHEJ repair is mediated by the Ku complex and the Ligase IV/XRCC4 complex along with other proteins whose precise biochemical functions remain to be elucidated. While *E. coli* lacks the NHEJ pathway, some Actinobacteria genera such as *Mycobacterium* have this repair pathway. Mycobacterial Ku binds DNA ends and recruits a polyfunctional DNA ligase/polymerase (LigD) *in vitro* (Della et al. 2004). Though repair is mutagenic, it does help maintain cell viability and loss of Ku and LigD increases sensitivity to ionizing radiation (Stephanou et al. 2007). *K. radiotolerans* appears to lack a Ku-like DNA binding protein. While it does encode an ATP-dependent DNA ligase (Cdc9, or LigB; table 2) NHEJ repair is not likely without Ku.

Ionizing radiation also causes many other types of DNA damage. The *K. radiotolerans* DNA replication, recombination and repair gene set is overlapping with [9], but generally different from those of *D. radiodurans* [18] and *E. coli* [19] which may be expected since these organisms belong to different phyla (table 2). As one illustration of this difference, *K. radiotolerans* but not *D. radiodurans* contains RecB and RecC which are involved in recombinational repair in *E. coli* (reviewed in [20]). DNA replication, repair and recombination systems in *K. radiotolerans* are more similar to those of *Mycobacterium tuberculosis* [21], possibly a reflection of the phylogenetic proximity of the two organisms. In addition, *M. tuberculosis* is at least 10-fold more resistant to ionizing radiation than *E. coli* [22]. Because *M. tuberculosis* is an actively studied pathogen its genome is well-annotated. Because it has coevolved the majority of its DNA replication, repair, and recombination mechanisms with *K. radiotolerans* we chose it as a reference organism, together with *E. coli* and .

Both *K. radiotolerans* and *M. tuberculosis* lack the classical bacterial mismatch repair genes MutS, MutH, MutL, RecJ, ExoVIII, ExoI and Mug (table 2). A compensating factor may be production of DNA polymerases with increased fidelity and proofreading efficiency as *K. radiotolerans* contains four exonuclease ( $\epsilon$ ; DnaQ) subunits, three polymerase ( $\alpha$ ; DnaE) subunits and two  $\beta$  (DnaN) subunits of the replicative DNA polymerase III. Mismatch repair in *K. radiotolerans* may also be handled by proteins unrelated to

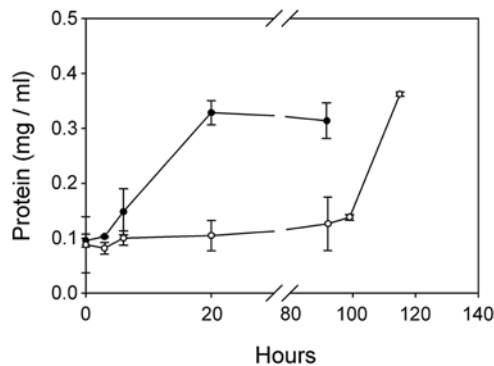

**Figure 4. Post-irradiation recovery and growth of *K. radiotolerans*.** The irradiated cultures were exposed to 20 kGy  $\gamma$ -radiation (open circles), and control cultures were incubated under laboratory conditions (closed circles).  
doi:10.1371/journal.pone.0003878.g004

classical bacterial mismatch repair proteins. Some base excision repair genes that may take on such roles are also uniquely overrepresented. There are three Fpg and four Nei base excisionases in *K. radiotolerans*, compared with one Fpg and no Nei homologs in *D. radiodurans*. As an additional example of divergence with *D. radiodurans*, 3-methyladenine DNA glycosylase I (Tag) is present in *K. radiotolerans*, but absent from *D. radiodurans*.

The nucleotide excision repair pathway is also overrepresented in *K. radiotolerans* by three *uvrA* orthologs and by five genes encoding UvrD-like helicases. In addition to these helicases, the *K. radiotolerans* genome, similarly to *M. tuberculosis*, contains an ERCC3 (XPB)-like superfamily II helicase, whose eukaryotic homolog performs essential functions in nucleotide excision repair and transcription [23]. The *K. radiotolerans* and *M. tuberculosis* XPB helicases have been recently demonstrated to be functional *in vitro* (Biswas and Tsodikov, unpublished).

Five homologs of histone-like proteins (IHF or HupB-like) may package DNA in order to protect it from damage, aid

recombinational repair, or maintain multiple chromosomes. The direct reversal pathway used to repair pyrimidine dimers includes two copies of the *phrB* photolyase gene and an additional, *splB* photolyase gene, which is absent in *E. coli*, *D. radiodurans* and *M. tuberculosis*. Other differences from *M. tuberculosis* include the presence in *K. radiotolerans* of PolA, Topo IV, HolIII, YejH, which are absent in *M. tuberculosis*. The translesion DNA repair system UmuC/UmuD, present in *E. coli* but not *D. radiodurans* or *M. tuberculosis*, is also a part of the *K. radiotolerans* genome.

Similar to mycobacteria, the *K. radiotolerans* replication gene set lacks a well-defined homolog of the helicase loader (DnaC), but contains the other main replication genes (DnaA, DnaB, DnaG). *K. radiotolerans* and *M. tuberculosis* both contain a eukaryotic-like DNA primase gene.

In summary, many of the genes known to confer radiation resistance in *D. radiodurans* are missing from *K. radiotolerans* suggesting novel components to the repair and protection toolbox. Two pathways are involved in DSB repair in other organisms, ESDSA repair mediated by RecA and PolA and NHEJ repair mediated by Ku and LigD. RecA and PolA are present and may be aided by the presence of RecB and RecC. *K. radiotolerans* lacks the Ku protein making the presence of the NHEJ pathway unlikely. Base excision and nucleotide excision repair pathway genes are over represented in *K. radiotolerans* relative to other bacteria.

### Reactive oxygen species detoxification

Most organisms have both RecA and PolA without exhibiting extreme radiation resistance. Remarkably, *D. radiodurans* cells rendered ionizing radiation-sensitive by a *polA* mutation are fully complemented by expression of the *polA* gene from ionizing radiation-sensitive *E. coli* [24]. Repair proteins, either native or cloned, may function better after irradiation in *D. radiodurans* cells due to protection from protein oxidation [25]. The genetic components and molecular mechanisms of protein repair/protection remain unknown but appear to be correlated with a Mn/Fe ratio in the range of 0.12–0.37 [26]. The Mn/Fe ratio in *K. radiotolerans* is 0.09, slightly lower than *Deinococcus* but much higher than that of radiation sensitive organisms [27].

**Table 1. Genes conferring ionizing radiation resistance in *Deinococcus radiodurans* and their homologs in *Kineococcus radiotolerans*.**

| <i>D. radiodurans</i> gene | Function                              | D <sub>10</sub> (kGy) <sup>1</sup> | Reference | Krad locus tag |
|----------------------------|---------------------------------------|------------------------------------|-----------|----------------|
| <i>recA</i>                | Homologous recombination              | 0.1                                | [11]      | 1492           |
| <i>polA</i>                | DNA polymerase                        | 1.0                                | [24]      | 2951           |
| <i>pprA</i>                | Stimulates DNA ligase                 | 2.0                                | [57]      | none           |
| <i>recQ</i>                | DNA helicase                          | 6.0                                | [58]      | 0829           |
| <i>recD</i>                | Helicase/exonuclease                  | 6.0                                | [59]      | 0992           |
| <i>ddrB</i>                | Unknown                               | 8.0                                | [11]      | none           |
| <i>crtB</i>                | Phytoene synthase                     | 9.0                                | [13]      | 3229           |
| <i>crtl</i>                | Phytoene desaturase                   | 9.0                                | [13]      | 3228           |
| <i>ddrA</i>                | ssDNA binding protein                 | 12.0                               | [11]      | none           |
| <i>ddrC</i>                | Unknown                               | >14.0                              | [11]      | none           |
| <i>ddrD</i>                | Unknown                               | >14.0                              | [11]      | none           |
| <i>sbC sbC</i>             | ss endonucleases 3'-5' ds exonuclease | 15.0                               | [60]      | 2553 2554      |
| <i>polX</i>                | ss endonucleases 3'-5' ds exonuclease | 15.0                               | [61]      | 4036           |

<sup>1</sup>Dose of  $\gamma$  radiation required for a 90% reduction in cell viability estimated from data supplied in the relevant reference. For comparison, the D<sub>10</sub> for wild *D. radiotolerans* strains ranges from 10–20 kGy depending on the strain and the assay conditions.

doi:10.1371/journal.pone.0003878.t001

**Table 2.** Genes coding for replication, repair and recombination functions in *E. coli*, *D. radiodurans*, *M. tuberculosis* and *K. radiotolerans*.

| Protein name | Protein description and comments <sup>B</sup>                                                                     | <i>Escherichia coli</i> | <i>Dainococcus radiodurans</i><br>R1 (locus tag) | <i>Mycobacterium tuberculosis</i><br>H37Rv (locus) | <i>Kineococcus radiotolerans</i><br>SRS30216 (locus)    |
|--------------|-------------------------------------------------------------------------------------------------------------------|-------------------------|--------------------------------------------------|----------------------------------------------------|---------------------------------------------------------|
| Ada          | O-6-methylguanine/O-4-methylthymine DNA methyltransferase                                                         | Ada                     | No homologs                                      | No homologs                                        | Krad_2866                                               |
| AlkA         | 3-methyladenine DNA glycosylase II; DR_2584 is of eukaryotic type                                                 | AlkA                    | DR_2584, DR_2074                                 | Rv1317c                                            | Krad_4325 Krad_3854                                     |
| AlkB         | Alkylation repair protein                                                                                         | AlkB                    | No homologs                                      | TIGR locus: NT02MT1098                             | No homologs                                             |
| Cdc9 (LigB)  | ATP-dependent DNA ligase                                                                                          | No homologs             | No homologs                                      | Rv3062                                             | Krad_4316                                               |
| ComEA        | DNA uptake protein                                                                                                | ComEA                   | DR_1855                                          | Rv2415c                                            | Krad_3435                                               |
| Dam          | GATC specific N6-adenine methylase                                                                                | Dam                     | No homologs                                      | No homologs                                        | No homologs                                             |
| Dcd          | dCTP deaminase                                                                                                    | Dcd                     | No homologs                                      | Rv0321                                             | Krad_4243                                               |
| Dcm          | Site-specific C-5 cytosine methyltransferase; VSP repair is targeted toward hotspots created by Dcm               | Dcm                     | No homologs                                      | Rv3037c (putative Dcm)                             | Krad_0734 (putative Dcm)                                |
| DinB/DinP    | DNA damage inducible protein P (DNA polymerase IV)                                                                | DinB                    | No homologs                                      | Rv3056 Rv1537 (DinX)                               | Krad_4326 Krad_3213                                     |
| DinF         | Possible DNA-damage-inducible protein F; integral membrane protein; Na <sup>+</sup> -driven multidrug efflux pump | DinF                    | DR_0792                                          | Rv2836c                                            | Krad_4334                                               |
| DinG         | ATP-dependent DNA helicase; SOS inducer                                                                           | DinG                    | No homologs                                      | Rv1329c                                            | Krad_1504                                               |
| DnaA         | Chromosomal replication initiator protein                                                                         | DnaA                    | DR_0002                                          | Rv0001c                                            | Krad_0001                                               |
| DnaB         | Replicative DNA helicase                                                                                          | DnaB                    | DR_0549                                          | Rv0058c                                            | Krad_4333                                               |
| DnaE         | DNA polymerase III (holoenzyme), $\alpha$ subunit                                                                 | DnaE                    | DR_0507                                          | Rv1547c Rv3370c                                    | Krad_3187 Krad_3215 Krad_0771<br>Krad_4598 (on pKRAD01) |
| DnaG         | DNA Primase                                                                                                       | DnaG                    | DR_0601                                          | Rv2343c                                            | Krad_3361                                               |
| DnaN         | DNA polymerase III (holoenzyme), $\beta$ subunit                                                                  | DnaN                    | DR_0001                                          | Rv0002                                             | Krad_1769 Krad_0002                                     |
| DnaQ         | DNA polymerase III (holoenzyme), $\epsilon$ subunit - 3'-5' exonuclease                                           | DnaQ                    | DR_0856                                          | Rv3711c                                            | Krad_4419 Krad_3247 Krad_4503<br>Krad_1768              |
| DnaZ/X       | DNA polymerase III (holoenzyme), $\gamma/\tau$ subunit                                                            | DnaZ/X                  | DR_2410                                          | Rv3721c                                            | Krad_0466                                               |
| Dut          | dUTPase                                                                                                           | Dut                     | No homologs                                      | Rv2697c                                            | Krad_1557                                               |
| ERCC3        | XPB/ERCC3 helicase                                                                                                | No homologs             | DR_A0131                                         | Rv0861c                                            | Krad_3612                                               |
| Fmu          | rRNA SAM-dependent methyltransferase                                                                              | Fmu                     | DR_2168                                          | Rv1407                                             | Krad_2983                                               |
| Fpg/MutM     | Formamidopyrimidine and 8-oxoguanine DNA glycosylase (Homolog of Nei; see below)                                  | Fpg/MutM                | DR_0493                                          | Rv2924c Rv0944                                     | Krad_1377 Krad_0158 Krad_0151                           |
| FtsK         | Chromosome resolution and positioning                                                                             | FtsK                    | DR_0400                                          | Rv2748c                                            | Krad_1482                                               |
| GyrA         | DNA gyrase, subunit A                                                                                             | GyrA                    | DR_1913                                          | Rv0006                                             | Krad_0007                                               |
| GyrB         | DNA gyrase, subunit B                                                                                             | GyrB                    | DR_0906                                          | Rv0005                                             | Krad_0006                                               |
| HAM1/YggV    | Xantoxine triphosphate pyrophosphatase, prevents 6-N-hydroxylaminopurine mutagenesis                              | HAM1/YggV               | DR_0179                                          | Rv1341                                             | Krad_3762                                               |
| HelD         | Helicase IV (ATP-dependent 3'-to-5' DNA helicase) involved in the RecF pathway of recombination                   | HelD                    | DR_1775 (putative UvrD)                          | No homologs                                        | Krad_0757 (putative UvrD)                               |
| HelY         | Probable helicase, Ski2 subfamily (ATP-dependent RNA helicase)                                                    | No homologs             | No homologs                                      | Rv2092c (HelY)                                     | Krad_1885 Krad_0173                                     |
| HelZ         | Probable helicase with a Zinc finger domain, Sfr2/Rad54 family                                                    | No homologs             | DR_1259                                          | Rv2101 (HelZ)                                      | Krad_1013                                               |
| HsdM         | Type I restriction/modification system DNA methylase                                                              | HsdM                    | No homologs                                      | Rv2756c                                            | No homologs                                             |

Table 2. Cont.

| Protein name | Protein description and comments <sup>B</sup>                                                                                                    | <i>Escherichia coli</i> | <i>Deinococcus radiodurans</i><br>R1 (locus tag) | <i>Mycobacterium tuberculosis</i><br>H37Rv (locus) | <i>Kineococcus radiotolerans</i><br>SRS30216 (locus) |
|--------------|--------------------------------------------------------------------------------------------------------------------------------------------------|-------------------------|--------------------------------------------------|----------------------------------------------------|------------------------------------------------------|
| HsdS         | Type I restriction/modification system specificity determinant                                                                                   | HsdS                    | No homologs                                      | Rv2755c (HsdS')                                    | No homologs                                          |
| HNS          | HU-histone protein                                                                                                                               | HNS                     | No homologs                                      | Rv3852                                             | No homologs                                          |
| HolA         | DNA polymerase III (holoenzyme), δ subunit                                                                                                       | HolA                    | DR_1244                                          | Rv2413c (unrelated to <i>E. coli</i> HolA)         | Krad_3422 (unrelated to <i>E. coli</i> HolA)         |
| HolB         | DNA polymerase III (holoenzyme), δ' subunit                                                                                                      | HolB                    | DR_2332                                          | Rv3644c                                            | Krad_0490                                            |
| HolC         | DNA polymerase III (holoenzyme), χ subunit                                                                                                       | HolC                    | No homologs                                      | No homologs                                        | No homologs                                          |
| HolD         | DNA polymerase III (holoenzyme), ψ subunit                                                                                                       | HolD                    | No homologs                                      | No homologs                                        | No homologs                                          |
| HolE         | DNA polymerase III (holoenzyme), θ subunit                                                                                                       | HolE                    | No homologs                                      | No homologs                                        | Krad_2840                                            |
| HrpA         | ATP-dependent helicase                                                                                                                           | HrpA                    | DR_0420                                          | No homologs                                        | Krad_3104 Krad_1244                                  |
| HupB/HF      | DNA binding protein II, Integration host factor (IHF); histone-like proteins                                                                     | HupB                    | DR_A0065                                         | Rv2986c(HupB) Rv1388 (IHF)                         | Krad_2337 Krad_1360 Krad_2805 Krad_2005 Krad_3371    |
| LexA         | Transcriptional regulator, repressor of the SOS regulon, autoprotease                                                                            | LexA                    | DR_A0344 DR_A0074                                | Rv2720                                             | Krad_1506                                            |
| Lhr          | ATP-dependent helicase superfamily II                                                                                                            | Lhr                     | No homologs                                      | Rv3296                                             | Krad_1489                                            |
| LigA         | DNA ligase, NAD(+)-dependent                                                                                                                     | LigA                    | DR_2069                                          | Rv3014c                                            | Krad_1315                                            |
| LigB         | DNA ligase, NAD(+)-dependent                                                                                                                     | LigB                    | No homologs                                      | Rv0938                                             | No homologs                                          |
| LigC         | Probable DNA ligase                                                                                                                              | No homologs             | No homologs                                      | Rv3731 (LigC)                                      | Krad_0653                                            |
| Mfd          | Transcription repair coupling factor; helicase                                                                                                   | Mfd                     | DR_1532                                          | Rv1020                                             | Krad_1067                                            |
| MPG          | 3-Methylpurine DNA glycosylase                                                                                                                   | MPG                     | DR_2074 (also see AlkA)                          | Rv1688                                             | Krad_3154                                            |
| Mrr          | Type IV restriction endonuclease                                                                                                                 | Mrr                     | DR_1877 DR_0508 DR_0587 Rv2528c                  | No homologs                                        | No homologs                                          |
| Mug (ygfF)   | G/T mismatch-specific thymine DNA glycosylase, distantly related to DR_1751; Present as a domain of many multidomain proteins in many eukaryotes | Mug (ygfF)              | DR_0715                                          | No homologs                                        | No homologs                                          |
| MutH         | Endonuclease, Component of the MutHLS complex functions in the methyl-directed mismatch repair pathway                                           | MutH                    | No homologs                                      | No homologs                                        | No homologs                                          |
| MutS         | ATPase, Component of the MutHLS complex functions in the methyl-directed mismatch repair pathway                                                 | MutS                    | DR_1976 DR_1039 contains a frameshift            | No homologs                                        | No homologs                                          |
| MutL         | Predicted ATPase, Component of the MutHLS complex functions in the methyl-directed mismatch repair pathway                                       | MutL                    | DR_1696                                          | No homologs                                        | No homologs                                          |
| MutT         | 8-oxo-dGTPase. D.r. encodes additional 17 paralogs; only some predicted to function in repair                                                    | MutT                    | DR_0261                                          | Rv2985c Rv1160c Rv0413c                            | Krad_1131 Krad_2346 Krad_3140 Krad_2697 Krad_0113    |
| MutY         | 8-oxoguanine DNA glycosylase & AP-lyase, A-G mismatch DNA glycosylase                                                                            | MutY                    | DR_2285                                          | Rv3589c                                            | Krad_0599                                            |
| Nei          | Endonuclease VIII (also see Fpg above)                                                                                                           | Nei                     | No homologs                                      | Rv3297 Rv2464c                                     | Krad_1488 Krad_3521 Krad_0294 Krad_3396              |
| Nfi          | Endonuclease V                                                                                                                                   | Nfi                     | DR_2162                                          | No homologs                                        | No homologs                                          |
| Nfo          | Endonuclease IV (AP endonuclease)                                                                                                                | Nfo                     | No homologs                                      | Rv0670                                             | No homologs                                          |
| Nth          | Endonuclease III & thymine glycol DNA glycosylase; DR_0928 and DR_2438 are of archaeal type and DR_0289 is close to yeast protein                | Nth                     | DR_2438, DR_0289, DR_0928 Rv3674c                |                                                    | Krad_0422                                            |
| Ogt          | O-6-methylguanine/O-4-methylthymine DNA methyltransferase                                                                                        | Ogt                     | DR_0428                                          | Rv1316c                                            | Krad_3712                                            |

Table 2. Cont.

| Protein name | Protein description and comments <sup>a</sup>                                                                                                                           | <i>Escherichia coli</i> | <i>Deinococcus radiodurans</i><br>R1 (locus tag) | <i>Mycobacterium tuberculosis</i><br>H37Rv (locus) | <i>Kineococcus radiotolerans</i><br>SRS30216 (locus) |
|--------------|-------------------------------------------------------------------------------------------------------------------------------------------------------------------------|-------------------------|--------------------------------------------------|----------------------------------------------------|------------------------------------------------------|
| ParC         | DNA Topoisomerase IV, subunit A (Type II topoisomerase)                                                                                                                 | ParC                    | No homologs                                      | No homologs                                        | Krad_1546                                            |
| ParE         | DNA Topoisomerase IV, subunit B (Type II topoisomerase)                                                                                                                 | ParE                    | No homologs                                      | No homologs                                        | Krad_1534                                            |
| PepA         | DNA binding (independent of Aminopeptidase activity) protein required for maintenance of plasmid monomers.                                                              | PepA                    | DR_0717                                          | Rv2213                                             | Krad_3276 Krad_1149                                  |
| PinR         | Putative recombinase                                                                                                                                                    | PinR                    | DR_C0005                                         | No homologs                                        | Krad_4707 Krad_4374                                  |
| PolA         | DNA polymerase I                                                                                                                                                        | PolA                    | DR_1707                                          | No homologs                                        | Krad_2951                                            |
| PolB         | DNA polymerase II                                                                                                                                                       | PolB                    | No homologs                                      | No homologs                                        | No homologs                                          |
| PriA         | Putative primosomal protein n' (replication factor Y)                                                                                                                   | PriA                    | DR_2606                                          | Rv1402                                             | Krad_2988                                            |
| PriB         | Core component of the primosome, binds to PriA and single-stranded DNA                                                                                                  | PriB                    | No homologs                                      | No homologs                                        | No homologs                                          |
| PhrB         | Photolyase (direct monomerization cyclobutane-type pyrimidine dimers)                                                                                                   | PhrB                    | No homologs                                      | No homologs                                        | Krad_3554 Krad_4047                                  |
| RadA         | Predicted ATP-dependent protease                                                                                                                                        | RadA (Sms)              | DR_1105                                          | Rv3585c                                            | Krad_4702                                            |
| RadC         | Predicted acyltransferase; predicted DNA-binding protein                                                                                                                | RadC                    | No homologs                                      | No homologs                                        | No homologs                                          |
| RarA         | Protein may play a role in recombination associated with DNA replication; putative ATPase related to the helicase subunit of the Holliday junction resolvase            | RarA                    | DR_1898                                          | Rv2559c                                            | Krad_3035                                            |
| RecA         | Recombinase; ssDNA-dependent ATPase, activator of LexA autoproteolysis                                                                                                  | RecA                    | DR_2340                                          | Rv2737c                                            | Krad_1492                                            |
| RecB         | Helicase/exonuclease                                                                                                                                                    | RecB                    | No homologs                                      | Rv0630c                                            | Krad_0993                                            |
| RecB (exo1)  | RecB family exonuclease 1                                                                                                                                               | No homologs             | No homologs                                      | Rv3202c                                            | Krad_1171                                            |
| RecB (exo2)  | RecB family exonuclease 2                                                                                                                                               | No homologs             | No homologs                                      | No homologs                                        | Krad_4407                                            |
| RecB (exo3)  | RecB family exonuclease 3                                                                                                                                               | No homologs             | No homologs                                      | Rv2119                                             | Krad_1855                                            |
| RecC         | Helicase/exonuclease                                                                                                                                                    | RecC                    | No homologs                                      | Rv0631c                                            | Krad_0992                                            |
| RecD         | Helicase/exonuclease; Contains three additional N-terminal helix-hairpin-helix DNA-binding modules; closely related to RecD from <i>B.subtilis</i> and <i>Chlamydia</i> | RecD                    | DR_1902                                          | Rv0629c                                            | Krad_0994                                            |
| RecE         | Exonuclease VIII                                                                                                                                                        | RecE                    | No homologs                                      | No homologs                                        | No homologs                                          |
| RecF         | Predicted ATPase; required for daughter-strand gap repair                                                                                                               | RecF                    | DR_1089                                          | Rv0003c                                            | Krad_0004                                            |
| RecG         | Holliday junction-specific DNA helicase; branch migration inducer                                                                                                       | RecG                    | DR_1916                                          | Rv2973c                                            | Krad_1368                                            |
| RecJ         | Single-stranded DNA-specific exonuclease                                                                                                                                | RecJ                    | DR_1126                                          | No homologs                                        | No homologs                                          |
| RecN         | Predicted ATPase                                                                                                                                                        | RecN                    | DR_1477                                          | Rv1696c                                            | Krad_3147                                            |
| RecO         | Required for daughter-strand gap repair                                                                                                                                 | RecO                    | DR_0819                                          | Rv2362c                                            | Krad_3375                                            |
| RecQ         | Helicase; suppressor of illegitimate recombination                                                                                                                      | RecQ                    | DR_1289 DR_2444                                  | Rv1253                                             | Krad_0829 RecQ-like: Krad_4305<br>Krad_4391          |
| RecR         | Required for daughter-strand gap repair                                                                                                                                 | RecR                    | DR_0198                                          | Rv3715c                                            | Krad_0465                                            |
| RecT         | DNA annealing protein                                                                                                                                                   | RecT                    | No homologs                                      | No homologs                                        | Krad_1418                                            |
| RecX         | Regulatory protein for RecA                                                                                                                                             | RecX                    | DR_1310                                          | Rv2736c                                            | Krad_1493                                            |
| RuvA         | Holliday-junction-binding subunit of the RuvABC resolvase                                                                                                               | RuvA                    | DR_1274                                          | Rv2593c                                            | Krad_3054                                            |

Table 2. Cont.

| Protein name | Protein description and comments <sup>B</sup>                                                                              | <i>Escherichia coli</i> | <i>Deinococcus radiodurans</i><br>R1 (locus tag) | <i>Mycobacterium tuberculosis</i><br>H37Rv (locus) | <i>Kineococcus radiotolerans</i><br>SRS30216 (locus)           |
|--------------|----------------------------------------------------------------------------------------------------------------------------|-------------------------|--------------------------------------------------|----------------------------------------------------|----------------------------------------------------------------|
| RuvB         | Helicase subunit of the RuvABC resolvase                                                                                   | RuvB                    | DR_0596                                          | Rv2592c                                            | Krad_3053 Krad_3828                                            |
| RuvC         | Endonuclease subunit of the RuvABC resolvase                                                                               | RuvC                    | DR_0440                                          | Rv2594c                                            | No homologs                                                    |
| RusA (YbcP)  | Endonuclease/Holliday junction resolvase                                                                                   | RusA (YbcP)             | No homologs                                      | No homologs                                        | No homologs                                                    |
| SbcB         | Exodeoxyribonuclease I                                                                                                     | SbcB                    | No homologs                                      | No homologs                                        | No homologs                                                    |
| SbcC         | Exonuclease subunit, Predicted ATPase                                                                                      | SbcC                    | DR_1922                                          | No homologs                                        | Krad_2553                                                      |
| SbcD         | Exonuclease                                                                                                                | SbcD                    | DR_1921                                          | Rv1277 (unrelated to <i>E. coli</i> SbcD)          | Krad_0868 Krad_2554<br>(Both unrelated to <i>E. coli</i> SbcD) |
| SdrA         | DNA or RNA helicase of superfamily II                                                                                      | No homologs             | No homologs                                      | Rv2917                                             | Krad_3772                                                      |
| Smf          | Predicted Rossmann fold nucleotide-binding protein involved in DNA uptake                                                  | Smf                     | DR_0120                                          | Rv2896c                                            | Krad_1409 Krad_4481                                            |
| SpIB         | Photolyase                                                                                                                 | No homologs             | No homologs                                      | No homologs                                        | Krad_0827 Krad_4460                                            |
| SrmB         | Superfamily II ATP-dependent helicase                                                                                      | RhlE                    | DR_0335 DR_1624                                  | Rv3211 Rv1253                                      | Krad_1242 Krad_0858                                            |
| Ssb          | Single-strand binding protein; D. radiodurans R1 has three incomplete ORFs corresponding to different fragments of the SSB | Ssb                     | DR_0099                                          | Rv0054 Rv2478c                                     | Krad_4338                                                      |
| Tag          | 3-methyladenine DNA glycosylase I                                                                                          | Tag                     | No homologs                                      | Rv1210                                             | Krad_0999                                                      |
| TopA/TopB    | DNA topoisomerase I (Type IA topoisomerase)/DNA topoisomerase III (Type I topoisomerase)                                   | TopA                    | DR_1374                                          | Rv3646c                                            | Krad_0487                                                      |
| UDG          | Uracil DNA glycosylase                                                                                                     | UDG                     | DR_1751                                          | Rv0322                                             | Krad_3900                                                      |
| UmuC         | Error-prone DNA polymerase; in conjunction with umuD and recA, catalyzes translesion DNA synthesis                         | UmuC                    | No homologs                                      | No homologs                                        | No homologs                                                    |
| UmuD         | In conjunction with UmuC and RecA, facilitates translesion DNA synthesis; autoprotease                                     | UmuD                    | No homologs                                      | No homologs                                        | No homologs                                                    |
| Ung          | Uracil DNA glycosylase; DR_0689 is a likely horizontal transfer from a eukaryote or a eukaryotic virus                     | Ung                     | DR_0689 DR_1663                                  | Rv2976c                                            | Krad_3639                                                      |
| Uve1/BS_YwjD | UV-endonuclease; activity was characterized in <i>Neurospora</i>                                                           | Uve1/BS_YwjD            | DR_1819                                          | No homologs                                        | No homologs                                                    |
| UvrA         | ATPase, DNA binding                                                                                                        | UvrA                    | DR_1771 DR_A0188                                 | Rv1638c                                            | Krad_2940 Krad_1787 Krad_0057                                  |
| UvrB         | Helicase                                                                                                                   | UvrB                    | DR_2275                                          | Rv1633c                                            | Krad_2942                                                      |
| UvrC         | Nuclease                                                                                                                   | UvrC                    | DR_1354                                          | Rv1420                                             | Krad_2935                                                      |
| UvrD         | DNA helicase II (DNA-dependent helicase activity) initiates unwinding from a nick; DR_1572 has a frameshift                | UvrD                    | DR_1775                                          | Rv0949 Rv3198c (putative)                          | Krad_0757 Krad_1179 Krad_1172<br>Krad_4408                     |
| UvrD2        | Putative helicase                                                                                                          | UvrD2                   | DR_1775 (putative UvrD2)                         | Rv3198c                                            | Krad_1179                                                      |
| Vsr          | Strand-specific, site specific, GT mismatch endonuclease; fixes deamination resulting from Dcm                             | Vsr                     | No homologs                                      | No homologs                                        | No homologs                                                    |
| XseA/nec7    | Exonuclease VII, large subunit                                                                                             | XseA/nec7               | DR_0186                                          | Rv1108c                                            | Krad_1122                                                      |
| XseB         | Exonuclease VII, small subunit                                                                                             | XseB                    | DR_2586                                          | Rv1107c                                            | Krad_1121                                                      |
| XthA         | Exodeoxyribonuclease III (AP endonuclease)                                                                                 | XthA                    | DR_0354                                          | Rv0427c                                            | Krad_4198 Krad_3979 Krad_0544                                  |
| YbaZ         | Possible methylated-DNA-[protein]-cysteine S-methyltransferase                                                             | YbaZ                    | DR_0428                                          | Rv3204                                             | Krad_1169                                                      |
| YhdJ         | Adenine-specific DNA methylase                                                                                             | YhdJ                    | DR_C0020                                         | No homologs                                        | No homologs                                                    |
| YejH         | DNA or RNA helicase of superfamily II                                                                                      | YejH                    | DR_A0131_1_2                                     | No homologs                                        | Krad_3612 (see also ERCC3)                                     |

Table 2. Cont.

| Protein name | Protein description and comments <sup>B</sup>                                                                                                       | <i>Escherichia coli</i> | <i>Deinococcus radiodurans</i><br>RT (locus tag) | <i>Mycobacterium tuberculosis</i><br>H37Rv (locus) | <i>Kineococcus radiotolerans</i><br>SRS30216 (locus) |
|--------------|-----------------------------------------------------------------------------------------------------------------------------------------------------|-------------------------|--------------------------------------------------|----------------------------------------------------|------------------------------------------------------|
| YqgF         | Predicted Holliday junction resolvase                                                                                                               | YqgF                    | No homologs                                      | Rv2554c                                            | Krad_3031                                            |
| XerC/XerD    | Putative recombinase in segregation of chromosomes, homologous recombination; tyrosine recombinase/inversion of on/off regulator of fimA, FimE/FimB | XerC/XerD               | DR_C0018 DR_A0155<br>DR_B0104                    | Rv1701 Rv2894c                                     | Krad_3139 Krad_1691                                  |
| 53EXOc       | 5'-3' exonuclease; T5 type 5'-3' exonuclease domains may co-occur with DNA polymerase I (Pol I) domains, or be part of Pol I containing complexes   | 53EXOc                  | DR_1707                                          | Rv2090                                             | Krad_1887                                            |
|              | Predicted eukaryotic-type DNA primase                                                                                                               | No homologs             | No homologs                                      | Rv3730c Rv0269c                                    | Krad_0652 Krad_4154                                  |
|              | Predicted site-specific integrase-resolvase                                                                                                         | No homologs             | No homologs                                      | Rv3750c Rv2310                                     | Krad_0047                                            |

doi:10.1371/journal.pone.0003878.t002

*D. radiodurans* is adept at detoxifying reactive oxygen species (ROS) during radiation exposure when many free radicals are generated from hydrolysis of water [13–15]. Like *Deinococcus*, *K. radiotolerans* produces carotenoids as one level of protection. *K. radiotolerans* also possesses an impressive suite of genes involved in ROS detoxification (table 3) comparable to those found in bacterial pathogens of mammals such as *Neisseria gonorrhoeae* [28]. Pathogenic bacteria are routinely exposed to oxidative stress by the host as part of an innate immune response. These results suggest a thorough ROS detoxification network.

### Bioremediation potential

Because *K. radiotolerans* was isolated from a HLW facility, the genome was examined for gene products that could be used to generate carbon or energy from organic compounds in the tanks. Orthologs belonging to known degradation pathways were not detected for U.S. Departments of Energy (DOE) and Defense (DOD) selected priority pollutants for including benzene, toluene, ethylbenzene, and xylenes (the BTEX compounds), chlorinated hydrocarbons, polynuclear aromatic hydrocarbons, polychlorinated biphenyls, ketones, alkanes, phenols, phthalates, explosives, and pesticides. Several homologues for atrazine degradation were noted (*AtzABZ*, Krad1947, 4281, 0533, respectively), though the pathway seems incomplete.

The SRS HLW also contains low molecular weight organic complexants which interfere with downstream chemical stabilization and processing. Commonly used complexants and decontamination reagents at the SRS include oxalate, glycolate, citrate, and formate. Growth using each organic acid as a sole carbon source was evaluated for *K. radiotolerans* in comparison with glucose as a positive control and 0.1% yeast extract as a negative control. Respiration was examined using O<sub>2</sub> consumption and CO<sub>2</sub> evolution. Preliminary studies revealed that citrate and glycolate were unsuitable growth substrates (data not shown). Respiration rates and biomass yields on glucose were higher than those of other carbon sources (table 4). Biomass yields with 5 mM oxalate and 5 mM formate were generally consistent with the 0.1% yeast extract control though higher concentrations were toxic. Similarly, O<sub>2</sub> consumption and CO<sub>2</sub> production were both better at lower oxalate and formate concentrations. While biomass production was similar between formate, oxalate, and YE, the respiration rates were higher for formate and oxalate.

Table 3. Reactive oxygen species detoxification genes in *K. radiotolerans*.

| Enzyme                                              | Krad Locus Tag |
|-----------------------------------------------------|----------------|
| Alkyl hydroperoxide reductase, <i>ahpC</i>          | 3757           |
| Catalase, <i>katE</i>                               | 0865           |
| Mn Catalase, <i>katA</i>                            | 0815           |
| Cytochrome c peroxidase, <i>mauG</i>                | Absent         |
| Glutathionyl spermidine synthase, GSP-Syn           | 2757           |
| Glutathione peroxidase, GSHPx                       | 1247           |
| Dyp-type peroxidase                                 | 3350           |
| Organic hydroperoxidase                             | 0813           |
| Peptide methionine sulfoxide reductase, <i>msrA</i> | 1091           |
| Fe/Mn superoxide dismutase, <i>sodA</i>             | 3578           |
| Superoxide reductase, <i>sorA</i>                   | Absent         |

doi:10.1371/journal.pone.0003878.t003

**Table 4.** Metabolism of glucose, oxalate and formate by *K. radiotolerans*.

| Substrate      | Consumption/Production Rates ( $\mu\text{mol/hr}$ ) |                 |                                 | Dry Weight (mg) |
|----------------|-----------------------------------------------------|-----------------|---------------------------------|-----------------|
|                | O <sub>2</sub>                                      | CO <sub>2</sub> | O <sub>2</sub> :CO <sub>2</sub> |                 |
| Glucose (5mM)  | 8.08                                                | 6.71            | 1.2                             | 2.77 $\pm$ 0.21 |
| Glucose (10mM) | 8.72                                                | 7.87            | 1.11                            | 3.05 $\pm$ 0.07 |
| Oxalate (5mM)  | 1.83                                                | 1.36            | 1.35                            | 2.17 $\pm$ 0.06 |
| Oxalate (10mM) | 1.42                                                | 1.09            | 1.31                            | 1.73 $\pm$ 0.21 |
| Formate (5mM)  | 6.43                                                | 6.36            | 1.01                            | 2.30 $\pm$ 0.10 |
| Formate (10mM) | 5.87                                                | 5.75            | 1.02                            | 1.43 $\pm$ 0.25 |
| YE (0.1%)      | 4.97                                                | 4.53            | 1.1                             | 2.20 $\pm$ 0.00 |
| Kill Control   | 0                                                   | 0               | 0                               | 0.00 $\pm$ 0.00 |

doi:10.1371/journal.pone.0003878.t004

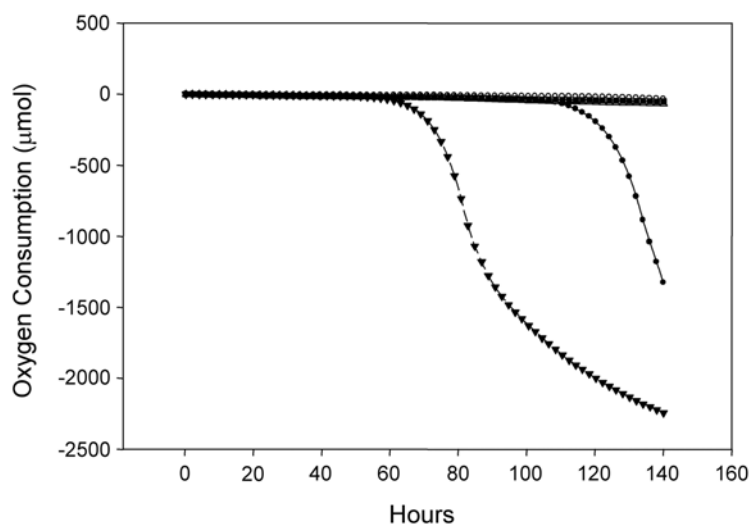**Figure 5. Substrate-facilitated survival and recovery of *K. radiotolerans* following starvation.** Following 7 days of incubation, cultures starved in the presence of oxalate (▼) and yeast extract (●) recovered following transfer to fresh TGY medium, while no respiratory response was measured from cultures starved in the presence of glucose, formate, citrate, or Tris buffer.

doi:10.1371/journal.pone.0003878.g005

While none of the carbon sources stimulated growth, formate and oxalate promote survival and quicken recovery of *K. radiotolerans* following prolonged starvation (table 5). In these experiments, chloramphenicol was used to accelerate starvation and to uncouple growth from survival. At intervals of 3, 7 or 14 days cells were resuspended in fresh TGY medium and respiration measured. After three days of incubation, substrate specific differences were already apparent. Once starvation was lifted, the highest respiration rates were recorded for cells starved in the presence of oxalate and formate. While all of the cultures recovered, the formate-starved culture was first to enter exponential growth, 4 hours ahead of all other treatments (data not shown). Remarkably, after 7 days of starvation, the highest rate of respiration was measured from the oxalate treated culture, which recovered and began exponential growth 60 hours after starvation was relieved (Figure 5). The yeast extract treated culture also recovered following more than 100 hours of post-starvation recovery. None of the cultures responded after 14 days of treatment.

*E. coli* contains three formate dehydrogenases. Formate dehydrogenase H (FdhF) is coupled to a hydrogenase and used for hydrogen

production by the formate hydrogen lyase reaction. *K. radiotolerans* appears to have this enzyme (Krad1331). Formate dehydrogenase N (FdnGHI) is induced when cells are grown anaerobically with nitrate. Formate dehydrogenase O (FdoGHI) is expressed aerobically and

**Table 5.** Starvation recovery of *K. radiotolerans*.

| Substrate  | Starvation Recovery (respiration rates, $\mu\text{mol/hr}$ ) |                 |                |                 |                |                 |
|------------|--------------------------------------------------------------|-----------------|----------------|-----------------|----------------|-----------------|
|            | 3 Days                                                       |                 | 7 Days         |                 | 14 Days        |                 |
|            | O <sub>2</sub>                                               | CO <sub>2</sub> | O <sub>2</sub> | CO <sub>2</sub> | O <sub>2</sub> | CO <sub>2</sub> |
| Glucose    | 8.63                                                         | 50.42           | 0.25           | 0.15            | 0.3            | 0.09            |
| Formate    | 19.57                                                        | 125.9           | 0.49           | 0.22            | 0.3            | 0.05            |
| Oxalate    | 11.02                                                        | 58.09           | 15.99          | 14.21           | 0.3            | 0.08            |
| Citrate    | 2.65                                                         | 11.32           | 0.37           | 0.13            | 0.3            | 0.05            |
| YE (0.01%) | 1.29                                                         | 1.12            | 9.47           | 8.54            | 0.07           | 0.09            |

doi:10.1371/journal.pone.0003878.t005

may participate in transfer of electrons from formate to oxygen. Formate dehydrogenases N and O have similar amino acid sequences. *K. radiotolerans* has one of the two (Krad1601, Krad1602, Krad1603), but it is difficult to tell based on the amino acid sequence whether it is an N-type or an O-type.

The *K. radiotolerans* genome encodes glycolysis, pentose phosphate, tricarboxylic acid (TCA) cycle and glyoxylate bypass pathways (table 6). The pentose phosphate cycle [29] and the glyoxylate bypass [30] may both be involved in radiation resistance and post-irradiation recovery as in *D. radiodurans*. Both

pathways are important routes for the production of biosynthetic metabolites while minimizing the production of damaging oxygen radicals. *K. radiotolerans* exhibits aerobic respiration on 5- and 6-carbon sugars (eg., fructose, amylose, maltose) and sugar alcohols (eg., glycerol, mannitol, sorbitol) (data not shown). A partial gluconeogenesis pathway was identified (missing pyruvate carboxylase, *pcb*, and glucose-6-phosphatase, *glp*). A partial Entner-Doudoroff pathway was also found, lacking glucose dehydrogenase, *gdh*, and phosphogluconate dehydratase, *edd*. Carbohydrate metabolism is supported by many ABC-type sugar transporters.

**Table 6.** Central metabolism in *K. radiotolerans*.

| Pathway                 | Krad Locus Tag | Gene Designation | Gene Product Function                      |
|-------------------------|----------------|------------------|--------------------------------------------|
| Glycolysis              | 3239           | <i>glcA</i>      | Hexokinase                                 |
|                         | 1463           | <i>gpi</i>       | Glucose-6-phosphate isomerase              |
|                         | 4274           | <i>pfkA</i>      | Fructose-6-phosphate kinase                |
|                         | 2157           | <i>fba</i>       | Fructose-1,6-bisphosphate aldolase         |
|                         | 2931           | <i>gapA</i>      | Glyceraldehyde-3 phosphate dehydrogenase   |
|                         | 2930           | <i>pgk</i>       | Phosphoglycerate kinase                    |
|                         | 0891           | <i>pgm</i>       | Phosphoglyceromutase                       |
|                         | 1073           | <i>eno</i>       | Enolase                                    |
|                         | 2959           | <i>pyk</i>       | Pyruvate kinase                            |
| Gluconeogenesis         | 3372           | <i>ppc</i>       | Phosphoenolpyruvate carboxykinase          |
|                         | 1463           | <i>pgi</i>       | Phosphoglucoisomerase                      |
|                         | Absent         | <i>pcb</i>       | Pyruvate carboxylase                       |
|                         | Absent         | <i>glp</i>       | Glucose-6-phosphatase                      |
| TCA Cycle               | 1140           | <i>glcA</i>      | Citrate synthase                           |
|                         | 1566           | <i>acnA</i>      | Aconitase                                  |
|                         | 3988           | <i>icd</i>       | Isocitrate dehydrogenase                   |
|                         | 1228           | <i>sucA</i>      | Oxoglutarate dehydrogenase                 |
|                         | 3279           | <i>sucB</i>      | Succinyl-transferase                       |
|                         | 3999           | <i>sucC</i>      | Succinyl-CoA synthetase, beta              |
|                         | 3998           | <i>sucD</i>      | Succinyl-CoA synthetase, alpha             |
|                         | 3955           | <i>frdB</i>      | Fumarate reductase                         |
|                         | 3954           | <i>sdhA</i>      | Succinate dehydrogenase                    |
|                         | 1112           | <i>fumC</i>      | Fumarase                                   |
| Entner-Doudoroff        | 0742           | <i>mdh</i>       | Malate dehydrogenase                       |
|                         | 1494           | <i>gnl</i>       | Gluconolactonase                           |
|                         | 0597           | <i>gntK</i>      | Gluconate kinase                           |
|                         | 2133           | <i>eda</i>       | 2-keto-3-deoxy-6-phosphogluconate aldolase |
|                         | Absent         | <i>edd</i>       | Phosphogluconate dehydratase               |
| Pentose Phosphate Cycle | Absent         | <i>glp</i>       | Glucose dehydrogenase                      |
|                         | 0133           | <i>zwf</i>       | Glucose-6-phosphate dehydrogenase          |
|                         | 2926           | <i>pgl</i>       | 6-Phosphogluconolactonase                  |
|                         | 0003           | <i>gnd</i>       | 6-Phosphogluconate dehydrogenase           |
|                         | 2922           | <i>tktA</i>      | Transketolase                              |
|                         | 2923           | <i>tal</i>       | Transaldolase                              |
|                         | 1918           | <i>rpiB</i>      | Ribose 5-phosphate isomerase               |
|                         | 2980           | <i>rpe</i>       | Ribulose phosphate 3-epimerase             |
| Glyoxalate Bypass       | 0108           | <i>aceA</i>      | Isocitrate lyase                           |
|                         | 2227           | <i>aceB</i>      | Malate synthase                            |

The *K. radiotolerans* genome was queried by the tblastn algorithm using reference sequences from the genomes of *Frankia alni* ACN14a, *Streptomyces coelicolor* A3(2), *Deinococcus radiodurans* R1, and *E. coli* K12. Cut-off values for confident identification required both amino acid percent identities >45% and an E-score < e-10. doi:10.1371/journal.pone.0003878.t006

Electron acceptors other than O<sub>2</sub> increase habitat diversity by enabling growth when oxygen tension is low. Krad1328 has strong identity with *Arthrobacter aureus* TC1 nitrate reductase. Nitrate respiration may be a general feature of *Arthrobacter* species as *Arthrobacter globiformis* and *Arthrobacter nicotianae* have been shown to utilize NO<sub>2</sub><sup>−</sup> as a terminal electron acceptor [31]. *Arthrobacter* spp. are routinely recovered from subsurface environments contaminated by high level radioactive waste [32,33]. Krad1328 is not related to the *Kuenenia stuttgartiensis* enzyme that participates in anammox, anaerobic ammonium oxidation during which nitrite and ammonium are converted directly into dinitrogen gas.

The *K. radiotolerans* genome possesses a large number of molybdopterine oxidoreductases. Krad4344 has striking identity to the trimethylamine-N-oxide (TMAO) reductase TorA from *E. coli* K12, which is a terminal electron acceptor that is specific for N-oxides. TorA is connected to the quinone pool via a membrane-bound penta-haem cytochrome (TorC) [34]. DorCA in *Rhodobacter* is very similar to TorCA with the difference that DorA catalyses reduction of both dimethylsulfoxide and TMAO. *K. radiotolerans* lacks a homolog to TorC or DorC and reduction of TMAO has not been experimentally examined. There is no evidence for the type of fumarate reductase that reduces fumarate to succinate during anaerobic growth or for proteins homologous those from *Shewanella* and *Geobacter* involved in metal reduction.

In summary, *K. radiotolerans* exhibits moderate nutritional versatility with genes for growth on a variety of carbon sources and at least two terminal electron acceptors. This organism appears to utilize two of the commonly used complexants, oxalate and formate. These results suggest that *K. radiotolerans* should be investigated for use in scrubbing complexants from HLW tanks. The ability of formate and oxalate to stimulate respiration and prolong viability might provide certain clues into the metabolic ecology of *K. radiotolerans*. *Kineococcus* species are commonly found on weathered rock, stone monuments, paintings, desert crust or varnish along with cyanobacteria and fungi which together form biotic crusts, lichens, or endolithic communities (Garrrity et al 1996, Gómez-Silva et al 2008, Imperi et al 2007, Kuhlman et al 2006, Schabereiter-Gurtner et al 2001, Torre et al 2003, Tringe et al 2005). Cyanobacteria, fungi, as well as plants, release formate and oxalate for toxic metal chelation and detoxification, and mineral dissolution (Neaman et al., 2005; West and Coombs, 1981). Several studies have demonstrated heterotrophic mineralization of oxalate to CO<sub>2</sub> without assimilation but the mechanism remains unknown.

## Life cycle

The production of motile zoospores is widespread but patchy among members of the Actinobacteria phylum. All three *Kineococcus* species produce zoospores during part of their life cycle, but zoospore formation has not been extensively examined in any species [2,35,36]. Zoospores are produced at the tips of substrate hyphae and in clusters on sporophores in the closely related genus *Kineosporia* [37]. However, *K. radiotolerans* cells do not produce hyphae or sporangioles. Cells grown in rich PYTG medium produce large clusters of nonmotile cells that alternate division planes to form cubes of cells connected by a thick extracellular matrix [2]. During stationary phase spherical, dispersed zoospores, approximately 1 µm in diameter, are produced. In PTYG medium, the spores lack flagella. Motile spores were observed only after exposure to 10% sandy loam extract or with certain carbon sources [2]. Thus the production of zoospores and the development of flagella on those spores are subject to environmental cues that remain to be elucidated.

Movement of *Kineosporia* SR11 zoospores up chemical gradients has been observed for a variety of inorganic compounds [38]. Remarkable speeds of up to 160 µm s<sup>−1</sup> are achieved in *Kineosporia* SR11 zoospores [38]. *Kineosporia* SR11 is attracted to K<sup>+</sup>, Mg<sup>+2</sup>, and Ca<sup>+2</sup> salts of phosphate, sulfate and halides, but not other combinations of these ions, suggesting that chemotaxis may be dependent on specific cations and anions pairs. The *K. radiotolerans* genome contains complete pathways for flagellar biogenesis and chemotaxis suggesting that zoospore dispersal is designed to colonize new niches for growth.

The bacterial flagellum is a complex nanomachine that requires dozens of gene products for its assembly and function. Flagellar gene expression is temporally regulated to produce proteins as they are needed for flagellar assembly. Where it has been examined, temporal control of flagellar gene expression is achieved through a transcriptional hierarchy initiated by a master regulator [39,40]. Flagellar genes in *K. radiotolerans* are clustered within a motility island located between Krad1621 and Krad1673 (table 7). Genes within this region encode components of the basal body, hook, filament, flagellar protein export apparatus, flagellar chaperones, flagellar motor and motor switch. None of the genes within the motility island encode proteins that share homology with known master regulators of flagellar biogenesis though some of the genes encode proteins involved in regulating expression of flagellar biogenesis or motility. One such regulatory protein is a FliA (σ<sup>28</sup>) homolog encoded by Krad1625. FliA is an alternative σ factor that is required for transcription of flagellar genes in many bacteria whose products are needed late in flagellar assembly [39,40]. Activity of FliA is often regulated by anti-sigma factor FlgM [39–41]. Upon completion of the hook-basal body complex FlgM is secreted from the cytoplasm via the flagellar protein export apparatus, which allows expression of the FliA-dependent flagellar genes. Bacteria that possess a *fliA* ortholog often also possess an ortholog of *flgM* [42], suggesting that negative control of FliA activity by FlgM is a general feature of flagellar gene regulation. *K. radiotolerans* does not possess a *flgM* ortholog, nor do the other flagellated Actinobacteria sequenced to date (*Norcardioides* sp. JS614, *Acidothermus cellulosilyticus* and *Leifsonia xyl*). It is possible that *K. radiotolerans* possesses a protein that is functionally equivalent to FlgM but does not share homology with it. Alternatively, regulation of FliA may occur through a novel mechanism in *K. radiotolerans* and related Actinobacteria.

A second regulatory gene within the *K. radiotolerans* motility island is *csrA*, which encodes the carbon storage regulator. The *csrA* gene is also associated with flagellum biosynthetic genes in *Norcardioides* sp. JS614, *A. cellulosilyticus* and *L. xyl*. CsrA is a global regulator that binds mRNA to regulate gene expression either positively or negatively [43,44]. CsrA-mediated control of flagellar biogenesis and/or motility has been demonstrated in some Gram-negative bacteria [45–47]. CsrA stimulates expression of *E. coli* *flhDC* (encodes the master regulator for flagellar biosynthesis) by binding the *flhDC* operon leader transcript and stabilizing the mRNA [47]. CsrA was recently shown to repress expression of the *Bacillus subtilis* flagellin gene, *hag*, by preventing ribosome binding to the transcript [48]. RNA footprinting assays identified two CsrA-binding sites in the *hag* transcript, one of which (BS2) overlaps the Shine-Dalgarno sequence. The corresponding region of the predicted transcript of the *K. radiotolerans* flagellin gene (Krad1626) matches well to the BS2 site of *B. subtilis* *hag* (9 of 12 bases match). Thus, CsrA may regulate expression of the *K. radiotolerans* flagellin gene as it does *B. subtilis* *hag*.

Developmental control of flagellar genes has been extensively examined during the dimorphic life cycle of *Caulobacter crescentus*, where a non-flagellated, stalked mother cell undergoes asymmetric binary fission to produce a flagellated swarmer cell [49–51]. The

**Table 7.** Flagellar genes from *K. radiotolerans*.

| Krad Locus tag | Gene designation             | Gene product function                |
|----------------|------------------------------|--------------------------------------|
| 1606           |                              | Methyl-accepting chemotaxis protein  |
| 1613           |                              | Methyl-accepting chemotaxis protein  |
| 1621           | <i>flgL</i>                  | Hook-associated protein 3            |
| 1622           | <i>flgK</i>                  | Hook-associated protein              |
| 1625           | <i>fliA</i>                  | Sigma-28                             |
| 1626           | <i>fliC</i>                  | Flagellin                            |
| 1627           | <i>fliD</i>                  | Flagellar capping protein            |
| 1628           | <i>fliS</i>                  | Flagellin-specific chaperone         |
| 1647           | <i>flgB</i>                  | Rod protein                          |
| 1648           | <i>flgC</i>                  | Rod protein                          |
| 1649           | <i>fliE</i>                  | MS-ring/rod linker                   |
| 1650           | <i>fliF</i>                  | MS-ring protein                      |
| 1651           | <i>fliG</i>                  | Motor switch protein                 |
| 1652           | <i>fliH</i>                  | Export apparatus component           |
| 1653           | <i>fliI</i>                  | ATPase for export apparatus          |
| 1656           | <i>fliK</i>                  | Hook-length control protein          |
| 1657           | <i>flgD</i>                  | Hook capping protein                 |
| 1658           | <i>flgE</i>                  | Hook protein                         |
| 1659           | <i>flbD</i> family member    | Function unknown                     |
| 1660           | <i>motA</i>                  | Flagellar motor component            |
| 1661           | <i>motB</i>                  | Flagellar motor component            |
| 1662           | <i>fliL</i>                  | Basal body protein, function unknown |
| 1663           | <i>fliM</i>                  | Motor switch protein                 |
| 1664           | <i>fliN</i>                  | Motor switch protein                 |
| 1665           | <i>fliO</i>                  | Export apparatus protein             |
| 1666           | <i>fliP</i>                  | Export apparatus protein             |
| 1667           | <i>fliQ</i>                  | Export apparatus protein             |
| 1668           | <i>fliR</i>                  | Export apparatus protein             |
| 1669           | <i>flhB</i>                  | Export apparatus protein             |
| 1670           | Possible <i>cckA</i> homolog | Histidine kinase; GAF domain protein |
| 1671           |                              | Histidine kinase; GAF domain protein |
| 1672           |                              | Receiver domain protein              |
| 1673           | <i>flhA</i>                  | Export apparatus component           |
| 1677           | <i>csrA</i>                  | Carbon storage regulator             |

doi:10.1371/journal.pone.0003878.t007

swarmer cell eventually differentiates into a mother cell, losing its flagellum and elaborating a stalk. Several genes involved in developmental regulation of flagellar biogenesis in *C. crescentus* have been identified [49–51] including *cckA*, a histidine kinase in an operon of export genes that activates the master regulator, CtrA [52]. Krad1670, a predicted histidine kinase, appears to be the last gene of an operon that includes *fliA*, *fliR* and *flhB*, genes encoding components of the flagellar protein export apparatus. Given this conservation in synteny *K. radiotolerans* Krad1670 may play a role in developmental regulation of flagellar biogenesis similar to that of *cckA* in *C. crescentus*.

Signal transduction in *K. radiotolerans* has been examined using the microbial signal transduction database MiST [53]. *K. radiotolerans* exhibits regulatory complexity comparable to that of

*Streptomyces spp.* with regard to two-component systems. *K. radiotolerans* is unusual in having 116 di-guanylate cyclase domains. In general these protein domains, which are used to synthesize the second messenger cyclic di-GMP, are over represented in members of the Frankineae suborder of the Actinobacteria but even still *K. radiotolerans* exhibits large over representation. These results suggests extensive transcriptional regulation by cyclic di-GMP, possibly through the use of riboswitches [54].

## Conclusions

Exposure to extreme levels of ionizing radiation does not occur naturally on this planet. While natural nuclear reactors may have existed on Earth about 2 billion years ago, for example in the Oklo region of Gabon, the extreme radiation resistance observed today is more likely to be an evolutionary response to desiccation, which challenges cell viability in a manner similar to ionizing radiation [55]. Like many other radiation resistant bacteria *K. radiotolerans* exhibits resistance to desiccation [2]. Nevertheless, such organisms may have tremendous potential in remediating metabolizable organic constituents of HLW. Removal of organic constituents directly in HLW tanks could greatly improve processing efficiency of HLW. *K. radiotolerans* appears to utilize two of the commonly used complexants at the SRS, oxalate and formate, and should be investigated for use in scrubbing complexants from HLW tanks.

## Materials and Methods

### Culture conditions and chemicals

*Kineococcus radiotolerans* SRS30216 (BAA-149) was obtained from the American Type Culture Collection (ATCC; Manassas, VA, USA). Cultures were maintained on TGY plating medium (1.0% tryptone, 0.1% glucose, 0.5% yeast extract, 1.4% Difco agar). Except where noted all experiments were conducted in semi-defined growth medium (6.1 g/L Tris (pH 7.0), 0.1% YE) amended with different carbon sources to a final concentration of 5 mM unless otherwise mentioned. All cultures were grown at 28°C and liquid cultures were shaken at 150 rpm.

### Genome sequencing

The genome of *Kineococcus radiotolerans* SRS30216 was sequenced at the Joint Genome Institute (JGI) using a combination of 3 kb, 8 kb and 340 kb DNA libraries. All general aspects of library construction and sequencing performed at the JGI can be found at <<http://www.jgi.doe.gov/>>. Draft assemblies were based on 70,886 total reads. All three libraries provided 9.5× coverage of the genome. The Phred/Phrap/Consed software package (<<http://www.phrap.com>>) was used for sequence assembly and quality assessment (Ewing and Green 1998; Ewing et al. 1998; Gordon et al. 1998).

After the shotgun stage, 23,746 reads were assembled with parallel phrap (High Performance Software, LLC). Possible misassemblies were corrected with Dupfinisher (Han, 2006,) clone shatter libraries or transposon bombing of bridging clones (Epicentre Biotechnologies, Madison, WI). Gaps between contigs were closed by editing in Consed, custom primer walks, or PCR amplification (Roche Applied Science, Indianapolis, IN ). A total of 4392 primer walk reactions, 5 transposon bombs, 28 clone shatter libraries, and 4 PCR shatter libraries were necessary to close gaps, to resolve repetitive regions, and to raise the quality of the finished sequence. The completed genome sequences of *K. radiotolerans* SRS30216 contains 71,381 reads, achieving an average of 14-fold sequence coverage per base with an error rate less than 1 in 100,000. The *K. radiotolerans* SRS30216 genome has 3 contigs. The main chromosome and the largest plasmid, pKrad1, both

appear to be linear. PCR and blunt end adapter PCR were used unsuccessfully to attempt to close the gaps.

### Southern blotting and PCR

A culture of *Kineococcus radiotolerans* was grown to mid log phase in 100 ml of PTYG (0.5% (w/v) yeast extract, 0.5% (w/v) tryptone, 0.5% (w/v) peptone, 0.006% (w/v)  $\text{MgSO}_4$ , 0.0006% (w/v)  $\text{CaCl}_2$ ). The cells were collected by centrifugation at  $10,000 \times g$  for five minutes, resuspended in 9.5 ml TE buffer (10 mM Tris-HCl, 1 mM EDTA, pH 8.0), and frozen at  $-20^\circ\text{C}$  for approximately one hour. The cells were quickly thawed at  $37^\circ\text{C}$ , mixed with 0.5 ml of 10% SDS and 50  $\mu\text{l}$  of 20 mg/ml proteinase K, and incubated at  $37^\circ\text{C}$  for one hour. Then 1.8 ml of 5 M NaCl was added along with 1.8 ml of 1 g CTAB (Hexadecyltrimethylammonium Bromide) and 10 ml of 0.7 M NaCl. The mixture was incubated for 20 minutes at  $65^\circ\text{C}$ , extracted with an equal volume of chloroform/isoamyl alcohol (24:1), and centrifuged for 10 minutes at  $10,000 \times g$  at room temperature. The aqueous upper phase was transferred to a fresh tube and the DNA precipitated with 0.6 volume of isopropanol then washed with 70% ethanol. The pellet was resuspended in 2 ml TE buffer and incubated at  $37^\circ\text{C}$  with 40  $\mu\text{g}/\text{ml}$  DNase free RNase for at least 1 hr.

The sample was extracted with an equal volume of Tris buffered phenol (pH 7.9) and the upper aqueous phase was transferred to a fresh tube, where it was extracted with an equal volume of 1:1 phenol and chloroform and then an equal volume of 24:1 chloroform and isoamyl alcohol. The DNA was precipitated with 0.5 M ammonium acetate and 60% ethanol at  $-20^\circ\text{C}$  for 20 minutes and then pelleted. The pellet was washed with 70% ethanol and allowed to air dry. The pellet was resuspended in 0.5 ml TE buffer and the DNA concentration was about 1  $\mu\text{g}/\text{ml}$ .

Probes were created for each theoretical end of the *K. radiotolerans* chromosome using PCR and digoxigenin nucleotides (Roche Biochemicals). Primers Krad2223F 5'CGGCAGATACCGGGTTTGATGTTTC3' and Krad2223R 5'CGATGTCCGGTGCGGCTGTAGC3' generated a DNA fragment that was homologous with Krad2223. The PCR reaction contained 0.1 ng of genomic DNA, 0.5  $\mu\text{M}$  of each primer solution. The genomic DNA was initially denatured 2 minutes at  $95^\circ\text{C}$ . In subsequent cycles the DNA was denatured for 30 seconds at  $95^\circ\text{C}$ , the primers were annealed at  $60^\circ\text{C}$  for 30 seconds, and the DNA extended at  $72^\circ\text{C}$  for 90 seconds. After 30 cycles the final extension was at  $72^\circ\text{C}$  for 3 minutes. The PCR products were separated by agarose gel electrophoresis to determine the success of the PCR reaction.

Genomic *K. radiotolerans* DNA was digested with restriction enzymes, BamHI, BglII or NcoI as specified by the manufacturer. The restriction fragments were separated by electrophoresis in 0.8% agarose. The gel was submerged in denaturing solution

(0.5 M NaOH, 1.5 M NaCl) for 30 minutes and neutralized (0.5 M Tris-HCl, 1.5 M NaCl, pH 7.5) for 30 minutes. The contents of the gel were transferred to a nylon membrane (Roche Biochemicals) using  $20\times$  SSC (0.3 M sodium citrate, 3 M NaCl, pH 7.0). The membrane was exposed in a UV crosslinker. Hybridizations were performed in roller bottles with 20 ml hybridization solution and 15  $\mu\text{l}$  probe at  $60^\circ\text{C}$  overnight as recommended by the manufacturer (Roche Biochemicals). CPSPD was added to the membrane, incubated at  $25^\circ\text{C}$  for 10 minutes and  $37^\circ\text{C}$  for 15 minutes, then exposed to X-ray film for 1–10 minutes.

### Starvation Experiments

*K. radiotolerans* was grown in TGY medium to mid-exponential phase ( $\sim 26$  hr) at  $28^\circ\text{C}$  and 150 rpm. Biomass was harvested by centrifugation, washed in  $1\times$  PBS (137 mM NaCl, 2.7 mM KCl, 10 mM  $\text{Na}_2\text{HPO}_4$ , 2 mM  $\text{KH}_2\text{PO}_4$ ), and split evenly into different tubes containing 50 mM Tris HCl (pH 7.0), 0.01% yeast extract, chloramphenicol (100  $\mu\text{g}/\text{ml}$ ), and an individual substrate at a final concentration of 5 mM. Cultures were incubated at  $28^\circ\text{C}$ . After 3, 7, and 14 days of imposed starvation, the biomass was harvested, suspended in fresh TGY medium (50 ml), and the ability of each culture to recover and resume growth was compared across substrates.

### Respirometry

Metabolic rates were measured using the Micro-Oxymax multichannel respirometer (Columbus Instruments; Columbus, OH, USA). Respirometry bottles (250 ml capacity) were filled with 50 ml of semi-defined growth medium and headspace gases were analyzed every 2 hr. Bottles were incubated at  $28^\circ\text{C}$  and 100 rpm. The Micro-Oxymax respirometer measures the volume of gas consumed ( $\text{O}_2$ ) or produced ( $\text{CO}_2$ ). Conversions were made to moles of gas using the ideal gas law. End point biomass determinations were made in 125 ml shake flasks using 25 ml of growth medium. Cells were filtered onto 0.22  $\mu\text{m}$  GS filters (Millipore) and dried to a constant weight at  $65^\circ\text{C}$ .

### Acknowledgments

These sequence data were produced by the US Department of Energy Joint Genome Institute <http://www.jgi.doe.gov/>.

### Author Contributions

Conceived and designed the experiments: CEB LJS. Performed the experiments: CEB SB GMH BWS ES CSH. Analyzed the data: CEB SB TB TRH OVT LJS. Wrote the paper: CEB OVT LJS.

### References

- Anderson AW, Nordon HC, Cain RF, Parrish G, Dugan D (1956) Studies on a radio-resistant micrococcus. I. Isolation, morphology, cultural characteristics and resistance to g-radiation. Food Technol 10: 575–578.
- Phillips RW, Wiegel J, Berry CJ, Fliermans C, Peacock AD, et al. (2002) *Kineococcus radiotolerans* sp. nov., a radiation-resistant, gram-positive bacterium. Int J Syst Evol Microbiol 52: 933–938.
- Hopwood DA (2006) Soil to genomics: the *Streptomyces* chromosome. Annu Rev Genet 40: 1–23.
- Tourand Y, Lee L, Chaconas G (2007) Telomere resolution by *Borrelia burgdorferi* ResT through the collaborative efforts of tethered DNA binding domains. Mol Microbiol 64: 580–590.
- Lobry JR (1996) Asymmetric substitution patterns in the two DNA strands of bacteria. Mol Biol Evol 13: 660–665.
- Gao F, Zhang CT (2007) *DoriC*: a database of *oriC* regions in bacterial genomes. Bioinformatics 23: 1866–1867.
- Cox MM, Battista JR (2005) *Deinococcus radiodurans* - the consummate survivor. Nat Rev Microbiol 3: 882–892.
- Daly MJ, Gaidamakova EK, Matrosova VY, Vasilenko A, Zhai M, et al. (2004) Accumulation of Mn(II) in *Deinococcus radiodurans* facilitates gamma-radiation resistance. Science 306: 1025–1028.
- Sghaier H, Ghedira K, Benkhal A, Barkallah I (2008) Basal DNA repair machinery is subject to positive selection in ionizing-radiation-resistant bacteria. BMC Genomics 9: 297.
- Sale JE (2007) Radiation resistance: resurrection by recombination. Curr Biol 17: R12–14.
- Tanaka M, Earl AM, Howell HA, Park MJ, Eisen JA, et al. (2004) Analysis of *Deinococcus radiodurans*'s transcriptional response to ionizing radiation and desiccation reveals novel proteins that contribute to extreme radioresistance. Genetics 168: 21–33.
- Zahradka K, Slade D, Bailone A, Sommer S, Averbeck D, et al. (2006) Reassembly of shattered chromosomes in *Deinococcus radiodurans*. Nature 443: 569–573.
- Zhang L, Yang Q, Luo X, Fang C, Zhang Q, et al. (2007) Knockout of *crtB* or *crtI* gene blocks the carotenoid biosynthetic pathway in *Deinococcus radio-*

- durans R1 and influences its resistance to oxidative DNA-damaging agents due to change of free radicals scavenging ability. Arch Microbiol.
14. Xu Z, Tian B, Sun Z, Lin J, Hua Y (2007) Identification and functional analysis of a phytoene desaturase gene from the extremely radioresistant bacterium *Deinococcus radiodurans*. Microbiology 153: 1642–1652.
  15. Tian B, Xu Z, Sun Z, Lin J, Hua Y (2007) Evaluation of the antioxidant effects of carotenoids from *Deinococcus radiodurans* through targeted mutagenesis, chemiluminescence, and DNA damage analyses. Biochim Biophys Acta 1770: 902–911.
  16. Weller GR, Kysela B, Roy R, Tonkin LM, Scanlan E, et al. (2002) Identification of a DNA nonhomologous end-joining complex in bacteria. Science 297: 1686–1689.
  17. Della M, Palmos PL, Tseng HM, Tonkin LM, Daley JM, et al. (2004) Mycobacterial Ku and ligase proteins constitute a two-component NHEJ repair machine. Science 306: 683–685.
  18. White O, Eisen JA, Heidelberg JF, Hickey EK, Peterson JD, et al. (1999) Genome sequence of the radioresistant bacterium *Deinococcus radiodurans* R1. Science 286: 1571–1577.
  19. Blattner FR, Plunkett G 3rd, Bloch CA, Perna NT, Burland V, et al. (1997) The complete genome sequence of *Escherichia coli* K-12. Science 277: 1453–1474.
  20. Kowalczykowski SC (2000) Initiation of genetic recombination and recombination-dependent replication. Trends Biochem Sci 25: 156–165.
  21. Cole ST, Brosch R, Parkhill J, Garnier T, Churcher C, et al. (1998) Deciphering the biology of *Mycobacterium tuberculosis* from the complete genome sequence. Nature 393: 537–544.
  22. Zack MB, Stottmeier K, Berg G, Kazemi H (1974) The effect of radiation on microbiologic characteristics of *M. tuberculosis*. Chest 66: 240–243.
  23. Drapkin R, Reardon JT, Ansari A, Huang JC, Zawel L, et al. (1994) Dual role of TFIIH in DNA excision repair and in transcription by RNA polymerase II. Nature 368: 769–772.
  24. Gutman PD, Fuchs P, Minton KW (1994) Restoration of the DNA damage resistance of *Deinococcus radiodurans* DNA polymerase mutants by *Escherichia coli* DNA polymerase I and Klenow fragment. Mutat Res 314: 87–97.
  25. Daly MJ, Gaidamakova EK, Matrosova VY, Vasilenko A, Zhai M, et al. (2007) Protein oxidation implicated as the primary determinant of bacterial radioresistance. PLoS Biol 5: e92.
  26. Fredrickson JK, Li SM, Gaidamakova EK, Matrosova VY, Zhai M, et al. (2008) Protein oxidation: key to bacterial desiccation resistance? Isme J.
  27. Bagwell CE, Milliken CE, Ghoshroy S, Blom DA (2008) Intracellular copper accumulation enhances the growth of *Kineococcus radiotolerans* during chronic irradiation. Appl Environ Microbiol 74: 1376–1384.
  28. Seib KL, Wu HJ, Kidd SP, Apicella MA, Jennings MP, et al. (2006) Defenses against oxidative stress in *Neisseria gonorrhoeae*: a system tailored for a challenging environment. Microbiol Mol Biol Rev 70: 344–361.
  29. Zhang YM, Liu JK, Wong TY (2003) The DNA excision repair system of the highly radioresistant bacterium *Deinococcus radiodurans* is facilitated by the pentose phosphate pathway. Mol Microbiol 48: 1317–1323.
  30. Liu Y, Zhou J, Omelchenko MV, Beliaev AS, Venkateswaran A, et al. (2003) Transcriptome dynamics of *Deinococcus radiodurans* recovering from ionizing radiation. Proc Natl Acad Sci U S A 100: 4191–4196.
  31. Eschbach M, Mobitz H, Rompf A, Jahn D (2003) Members of the genus *Arthrobacter* grow anaerobically using nitrate ammonification and fermentative processes: anaerobic adaptation of aerobic bacteria abundant in soil. FEMS Microbiol Lett 223: 227–230.
  32. Fredrickson JK, Zachara JM, Balkwill DL, Kennedy D, Li SM, et al. (2004) Geomicrobiology of high-level nuclear waste-contaminated vadose sediments at the Hanford site, Washington state. Appl Environ Microbiol 70: 4230–4241.
  33. Lloyd JR, Renshaw JC (2005) Bioremediation of radioactive waste: radionuclide-microbe interactions in laboratory and field-scale studies. Curr Opin Biotechnol 16: 254–260.
  34. McCrindle SL, Kappler U, McEwan AG (2005) Microbial dimethylsulfoxide and trimethylamine-N-oxide respiration. Adv Microb Physiol 50: 147–198.
  35. Yokota A, Tamura T, Nishii T, Hasegawa T (1993) *Kineococcus aurantiacus* gen. nov., sp. nov., a new aerobic, gram-positive, motile coccus with meso-diaminopimelic acid and arabinogalactan in the cell wall. Inter J System Bacteriol 43: 52–57.
  36. Lee SD (2006) *Kineococcus marinus* sp. nov., isolated from marine sediment of the coast of Jeju, Korea. Int J Syst Evol Microbiol 56: 1279–1283.
  37. Kudo T, Matsushima K, Itoh T, Sasaki J, Suzuki K (1998) Description of four new species of the genus *Kineosporia*: *Kineosporia succinea* sp. nov., *Kineosporia rhizophila* sp. nov., *Kineosporia mikuniensis* sp. nov. and *Kineosporia rhamnosa* sp. nov., isolated from plant samples, and amended description of the genus *Kineosporia*. Int J Syst Bacteriol 48 (Pt 4): 1245–1255.
  38. Radajewski S, Duxbury T (2001) Motility Responses and Desiccation Survival of Zoospores from the Actinomycete *Kineosporia* sp. Strain SR11. Microb Ecol 41: 233–244.
  39. Aldridge P, Hughes KT (2002) Regulation of flagellar assembly. Curr Opin Microbiol 5: 160–165.
  40. McCarter LL (2006) Regulation of flagella. Curr Opin Microbiol 9: 180–186.
  41. Helmann JD (1999) Anti-sigma factors. Curr Opin Microbiol 2: 135–141.
  42. Pallen MJ, Penn CW, Chaudhuri RR (2005) Bacterial flagellar diversity in the post-genomic era. Trends Microbiol 13: 143–149.
  43. Babitzke P, Romeo T (2007) CsrB sRNA family: sequestration of RNA-binding regulatory proteins. Curr Opin Microbiol 10: 156–163.
  44. Romeo T (1998) Global regulation by the small RNA-binding protein CsrA and the non-coding RNA molecule CsrB. Mol Microbiol 29: 1321–1330.
  45. Heurlier K, Williams F, Heeb S, Dormond C, Pessi G, et al. (2004) Positive control of swarming, rhamnolipid synthesis, and lipase production by the posttranscriptional RsmA/RsmZ system in *Pseudomonas aeruginosa* PAO1. J Bacteriol 186: 2936–2945.
  46. Lawhon SD, Frye JG, Suyemoto M, Porwollik S, McClelland M, et al. (2003) Global regulation by CsrA in *Salmonella typhimurium*. Mol Microbiol 48: 1633–1645.
  47. Wei BL, Brun-Zinkernagel AM, Simecka JW, Pruss BM, Babitzke P, et al. (2001) Positive regulation of motility and flhDC expression by the RNA-binding protein CsrA of *Escherichia coli*. Mol Microbiol 40: 245–256.
  48. Yakhnin H, Pandit P, Petty TJ, Baker CS, Romeo T, et al. (2007) CsrA of *Bacillus subtilis* regulates translation initiation of the gene encoding the flagellin protein (hag) by blocking ribosome binding. Mol Microbiol 64: 1605–1620.
  49. Ausmees N, Jacobs-Wagner C (2003) Spatial and temporal control of differentiation and cell cycle progression in *Caulobacter crescentus*. Annu Rev Microbiol 57: 225–247.
  50. Holtzendorff J, Reinhardt J, Viollier PH (2006) Cell cycle control by oscillating regulatory proteins in *Caulobacter crescentus*. Bioessays 28: 355–361.
  51. Quardokus EM, Brun YV (2003) Cell cycle timing and developmental checkpoints in *Caulobacter crescentus*. Curr Opin Microbiol 6: 541–549.
  52. Jacobs C, Domian IJ, Maddock JR, Shapiro L (1999) Cell cycle-dependent polar localization of an essential bacterial histidine kinase that controls DNA replication and cell division. Cell 97: 111–120.
  53. Ulrich LE, Zhulin IB (2007) MiST: a microbial signal transduction database. Nucleic Acids Res 35: D386–390.
  54. Sudarsan N, Lee ER, Weinberg Z, Moy RH, Kim JN, et al. (2008) Riboswitches in eubacteria sense the second messenger cyclic di-GMP. Science 321: 411–413.
  55. Mattimore V, Battista JR (1996) Radioresistance of *Deinococcus radiodurans*: functions necessary to survive ionizing radiation are also necessary to survive prolonged desiccation. J Bacteriol 178: 633–637.
  56. Stothard P, Wishart DS (2005) Circular genome visualization and exploration using CGView. Bioinformatics 21: 537–539.
  57. Narumi I, Satoh K, Cui S, Funayama T, Kitayama S, et al. (2004) PprA: a novel protein from *Deinococcus radiodurans* that stimulates DNA ligation. Mol Microbiol 54: 278–285.
  58. Huang L, Hua X, Lu H, Gao G, Tian B, et al. (2007) Three tandem HRDC domains have synergistic effect on the RecQ functions in *Deinococcus radiodurans*. DNA Repair (Amst) 6: 167–176.
  59. Servinsky MD, Julin DA (2007) Effect of a recD Mutation on DNA Damage Resistance and Transformation in *Deinococcus radiodurans*. J Bacteriol 189: 5101–5107.
  60. Bentchikou E, Servant P, Coste G, Sommer S (2007) Additive effects of SbcCD and PolX deficiencies in the in vivo repair of DNA double-strand breaks in *Deinococcus radiodurans*. J Bacteriol 189: 4784–4790.
  61. Lecoate F, Shevelev IV, Bailone A, Sommer S, Hubscher U (2004) Involvement of an X family DNA polymerase in double-stranded break repair in the radioresistant organism *Deinococcus radiodurans*. Mol Microbiol 53: 1721–1730.
